# Supplementary material for: Personalised biopsy schedules based on risk of Gleason upgrading for patients with low‐risk prostate cancer on active surveillance
Source: PubMed Central journal article supplement — BJU Int. 2020 Aug 1;127(1):96–107. doi: 10.1111/bju.15136 (PMC7818468; doi:10.1111/bju.15136), 2020-08-01
Supplement: BJU-127-96-s001.pdf [file BJU-127-96-s001.pdf]

# Supplementary Materials for “Risk of Upgrading Based Personalized Biopsy Schedules for Prostate Cancer Active Surveillance Patients”

Anirudh Tomer, MSc<sup>a,\*</sup>, Daan Nieboer, MSc<sup>b</sup>, Monique J. Roobol, PhD<sup>c</sup>, Anders Bjartell, MD, PhD<sup>d</sup>, Ewout W. Steyerberg, PhD<sup>b,e</sup>, Dimitris Rizopoulos, PhD<sup>a</sup>, Movember Foundation’s Global Action Plan Prostate Cancer Active Surveillance (GAP3) consortium<sup>f</sup>

<sup>a</sup>*Department of Biostatistics, Erasmus University Medical Center, Rotterdam, the Netherlands*

<sup>b</sup>*Department of Public Health, Erasmus University Medical Center, Rotterdam, the Netherlands*

<sup>c</sup>*Department of Urology, Erasmus University Medical Center, Rotterdam, the Netherlands*

<sup>d</sup>*Department of Urology, Skåne University Hospital, Malmö, Sweden*

<sup>e</sup>*Department of Biomedical Data Sciences, Leiden University Medical Center, Leiden, the Netherlands*

<sup>f</sup>*The Movember Foundation’s Global Action Plan Prostate Cancer Active Surveillance (GAP3) consortium members presented in Appendix F*

---

---

## 1 Appendix A. A Joint Model for the Longitudinal PSA, and Time 2 to Gleason Upgrading

3 Let  $T_i^*$  denote the true time of upgrading (increase in biopsy Gleason  
4 grade group from 1 to 2 or higher) for the  $i$ -th patient included in PRIAS.  
5 Since biopsies are conducted periodically,  $T_i^*$  is observed with interval cen-  
6 soring  $l_i < T_i^* \leq r_i$ . When upgrading is observed for the patient at his latest

---

\*Corresponding author (Anirudh Tomer): Erasmus MC, kamer flex Na-2823, PO Box 2040, 3000 CA Rotterdam, the Netherlands. Tel: +31 10 70 43393

*Email addresses:* a.tomer@erasmusmc.nl (Anirudh Tomer, MSc), d.nieboer@erasmusmc.nl (Daan Nieboer, MSc), m.roobol@erasmusmc.nl (Monique J. Roobol, PhD), anders.bjartell@med.lu.se (Anders Bjartell, MD, PhD), e.w.steyerberg@lumc.nl (Ewout W. Steyerberg, PhD), d.rizopoulos@erasmusmc.nl (Dimitris Rizopoulos, PhD)

7 biopsy time  $r_i$ , then  $l_i$  denotes the time of the second latest biopsy. Oth-  
 8 erwise,  $l_i$  denotes the time of the latest biopsy and  $r_i = \infty$ . Let  $\mathbf{y}_i$  denote  
 9 his observed PSA longitudinal measurements. The observed data of all  $n$   
 10 patients is denoted by  $\mathcal{A}_n = \{l_i, r_i, \mathbf{y}_i; i = 1, \dots, n\}$ .

In our joint model, the patient-specific PSA measurements over time are modeled using a linear mixed effects sub-model. It is given by (see Panel A, Figure 1):

$$\begin{aligned} \log_2 \{y_i(t) + 1\} &= m_i(t) + \varepsilon_i(t), \\ m_i(t) &= \beta_0 + b_{0i} + \sum_{k=1}^4 (\beta_k + b_{ki}) B_k \left( \frac{t-2}{2}, \frac{\mathcal{K}-2}{2} \right) + \beta_5 \text{age}_i, \end{aligned} \quad (1)$$

11 where,  $m_i(t)$  denotes the measurement error free value of  $\log_2(\text{PSA}+1)$  trans-  
 12 formed [2, 3] measurements at time  $t$ . We model it non-linearly over time us-  
 13 ing B-splines [4]. To this end, our B-spline basis function  $B_k\{(t-2)/2, (\mathcal{K}-2)/2\}$   
 14 has three internal knots at  $\mathcal{K} = \{0.5, 1.3, 3\}$  years, which are the three quar-  
 15 tiles of the observed follow-up times. The boundary knots of the spline are  
 16 at 0 and 6.3 years (95-th percentile of the observed follow-up times). We  
 17 mean centered (mean 2 years) and standardized (standard deviation 2 years)  
 18 the follow-up time  $t$  and the knots of the B-spline  $\mathcal{K}$  during parameter esti-  
 19 mation for better convergence. The fixed effect parameters are denoted by  
 20  $\{\beta_0, \dots, \beta_5\}$ , and  $\{b_{0i}, \dots, b_{4i}\}$  are the patient specific random effects. The  
 21 random effects follow a multivariate normal distribution with mean zero and  
 22 variance-covariance matrix  $\mathbf{W}$ . The error  $\varepsilon_i(t)$  is assumed to be t-distributed  
 23 with three degrees of freedom (see Appendix B.1) and scale  $\sigma$ , and is inde-  
 24 pendent of the random effects.

To model the impact of PSA measurements on the risk of upgrading, our joint model uses a relative risk sub-model. More specifically, the hazard of upgrading denoted as  $h_i(t)$ , and the cumulative-risk of upgrading denoted as  $R_i(t)$ , at a time  $t$  are (see Panel C, Figure 1):

$$\begin{aligned} h_i(t) &= h_0(t) \exp \left( \gamma \text{age}_i + \alpha_1 m_i(t) + \alpha_2 \frac{dm_i(t)}{dt} \right), \\ R_i(t) &= \exp \left\{ - \int_0^t h_i(s) ds \right\}, \end{aligned} \quad (2)$$

where,  $\gamma$  is the parameter for the effect of age. The impact of PSA on the hazard of upgrading is modeled in two ways, namely the impact of the error

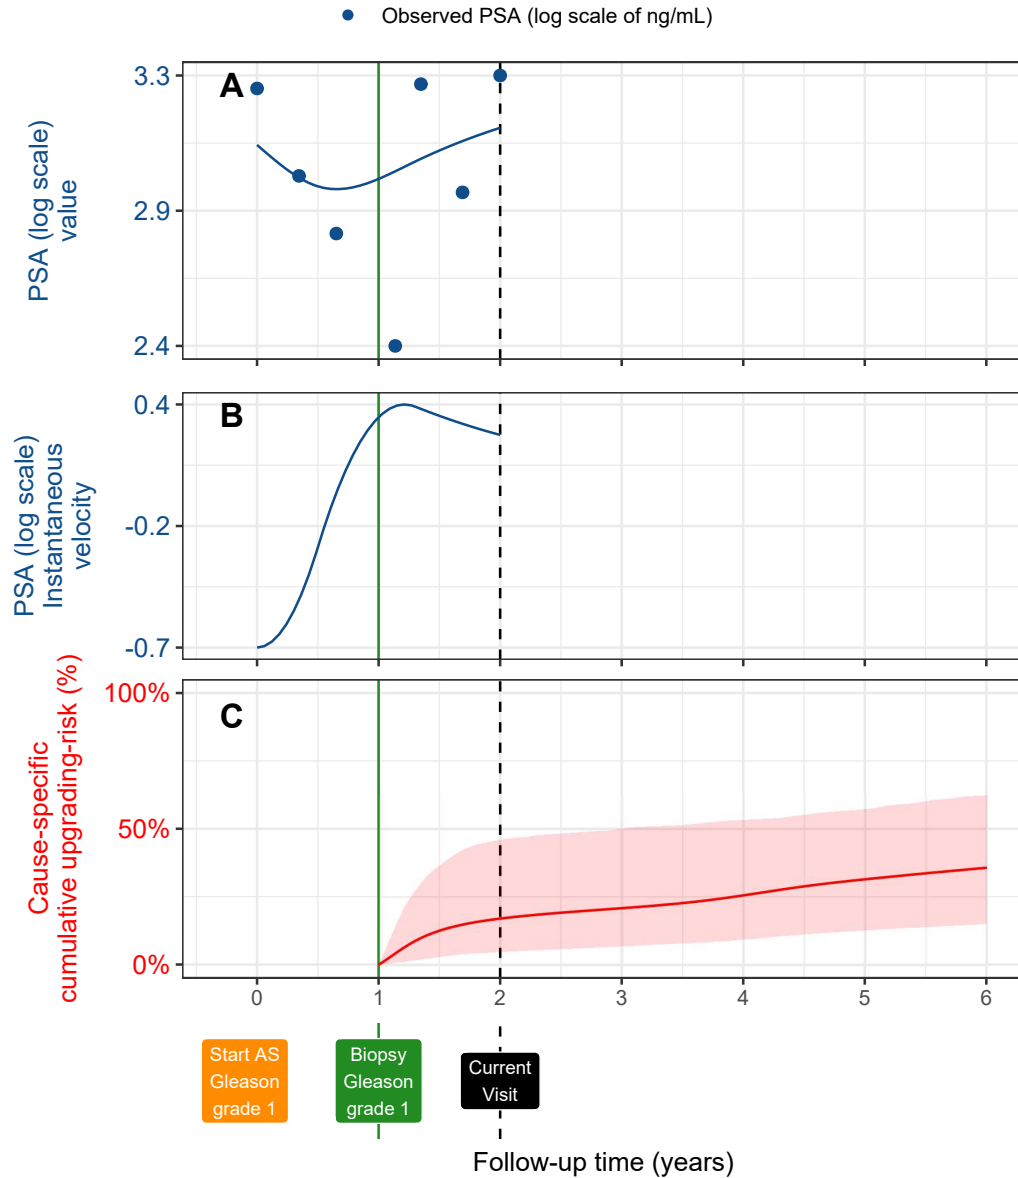

Figure 1: **Illustration of the joint model on a real PRIAS dataset patient.** **Panel A:** Observed (blue dots) and fitted PSA (solid blue line) measurements, log-transformed. **Panel B:** Estimated instantaneous velocity of PSA (log-transformed). **Panel C:** Predicted cumulative-risk of upgrading (95% credible interval shaded). Upgrading is defined as an increase in Gleason grade group [1] from grade group 1 to 2 or higher. This risk of upgrading is available starting from the time of the latest negative biopsy (vertical green line at year 1 of follow-up). The joint model estimated it by combining the fitted PSA value and velocity (both on the log scale of PSA) and time of the latest negative biopsy. Black dashed line at year 4 denotes the time of current visit.

free underlying PSA value  $m_i(t)$  (see Panel A, Figure 1), and the impact of the underlying PSA velocity  $dm_i(t)/dt$  (see Panel B, Figure 1). The corresponding parameters are  $\alpha_1$  and  $\alpha_2$ , respectively. Lastly,  $h_0(t)$  is the baseline hazard at time  $t$ , and is modeled flexibly using P-splines [5]. More specifically:

$$\log h_0(t) = \gamma_{h_0,0} + \sum_{q=1}^Q \gamma_{h_0,q} B_q(t, \mathbf{v}),$$

25 where  $B_q(t, \mathbf{v})$  denotes the  $q$ -th basis function of a B-spline with knots  $\mathbf{v} =$   
 26  $v_1, \dots, v_Q$  and vector of spline coefficients  $\gamma_{h_0}$ . To avoid choosing the number  
 27 and position of knots in the spline, a relatively high number of knots (e.g.,  
 28 15 to 20) are chosen and the corresponding B-spline regression coefficients  
 29  $\gamma_{h_0}$  are penalized using a differences penalty [5].

We estimate the parameters of the joint model using Markov chain Monte Carlo (MCMC) methods under the Bayesian framework. Let  $\boldsymbol{\theta}$  denote the vector of all of the parameters of the joint model. The joint model postulates that given the random effects, the time of upgrading, and the PSA measurements taken over time are all mutually independent. Under this assumption the posterior distribution of the parameters is given by:

$$\begin{aligned} p(\boldsymbol{\theta}, \mathbf{b} \mid \mathcal{A}_n) &\propto \prod_{i=1}^n p(l_i, r_i, \mathbf{y}_i \mid \mathbf{b}_i, \boldsymbol{\theta}) p(\mathbf{b}_i \mid \boldsymbol{\theta}) p(\boldsymbol{\theta}) \\ &\propto \prod_{i=1}^n p(l_i, r_i \mid \mathbf{b}_i, \boldsymbol{\theta}) p(\mathbf{y}_i \mid \mathbf{b}_i, \boldsymbol{\theta}) p(\mathbf{b}_i \mid \boldsymbol{\theta}) p(\boldsymbol{\theta}), \\ p(\mathbf{b}_i \mid \boldsymbol{\theta}) &= \frac{1}{\sqrt{(2\pi)^q \det(\mathbf{W})}} \exp \left\{ -\frac{1}{2} (\mathbf{b}_i^T \mathbf{W}^{-1} \mathbf{b}_i) \right\}, \end{aligned}$$

where, the likelihood contribution of the PSA outcome, conditional on the random effects is:

$$p(\mathbf{y}_i \mid \mathbf{b}_i, \boldsymbol{\theta}) = \frac{1}{(\sqrt{2\pi}\sigma^2)^{n_i}} \exp \left\{ -\frac{\sum_{j=1}^{n_i} (y_{ij} - m_{ij})^2}{2\sigma^2} \right\},$$

where  $n_i$  is the number of PSA measurements of the  $i$ -th patient. The likelihood contribution of the time of upgrading outcome is given by:

$$p(l_i, r_i \mid \mathbf{b}_i, \boldsymbol{\theta}) = \exp \left\{ -\int_0^{l_i} h_i(s) ds \right\} - \exp \left\{ -\int_0^{r_i} h_i(s) ds \right\}. \quad (3)$$

30 The integrals in (3) do not have a closed-form solution, and therefore we use  
31 a 15-point Gauss-Kronrod quadrature rule to approximate them.

32 We use independent normal priors with zero mean and variance 100 for  
33 the fixed effects  $\{\beta_0, \dots, \beta_5\}$ , and inverse Gamma prior with shape and rate  
34 both equal to 0.01 for the parameter  $\sigma^2$ . For the variance-covariance matrix  
35  $\mathbf{W}$  of the random effects, we take inverse Wishart prior with an identity scale  
36 matrix and degrees of freedom equal to 5 (number of random effects). For  
37 the relative risk model's parameter  $\gamma$  and the association parameters  $\alpha_1, \alpha_2$ ,  
38 we use independent normal priors with zero mean and variance 100.

### 39 *Appendix A.1. Assumption of t-distributed (df=3) Error Terms*

40 With regards to the choice of the distribution for the error term  $\varepsilon$  for  
41 the PSA measurements (see Equation 1), we attempted fitting multiple joint  
42 models differing in error distribution, namely t-distribution with three, and  
43 four degrees of freedom, and a normal distribution for the error term. How-  
44 ever, the model assumption for the error term was best met by the model with  
45 t-distribution having three degrees of freedom. The quantile-quantile plot of  
46 subject-specific residuals for the corresponding model in Panel A of Figure 2,  
47 shows that the assumption of t-distributed (df=3) errors is reasonably met  
48 by the fitted model.

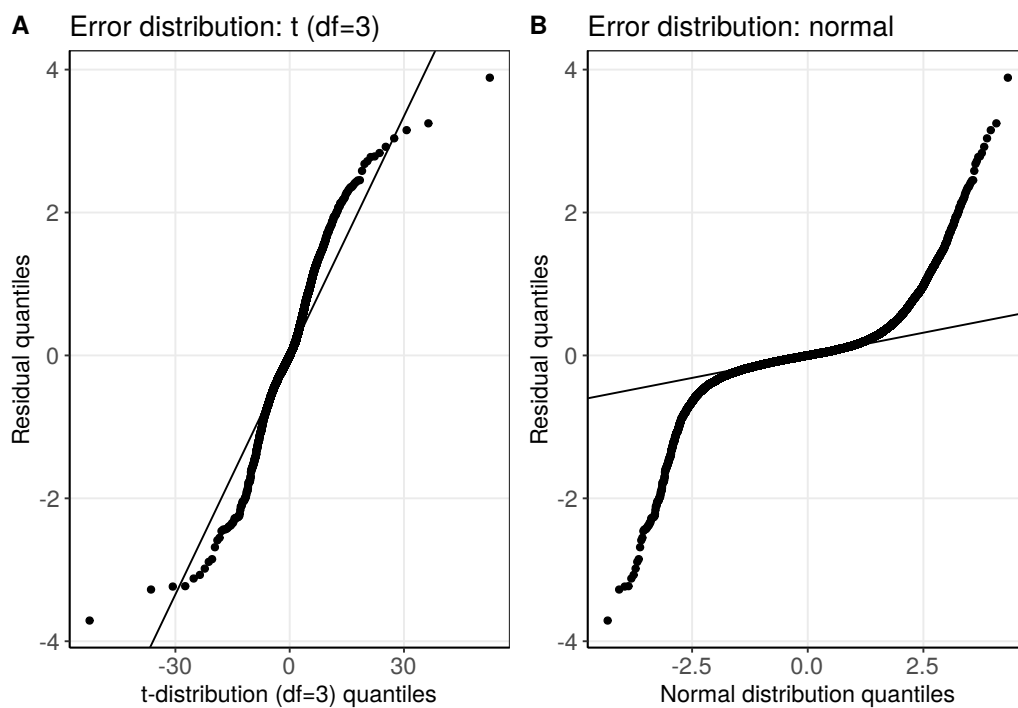

Figure 2: **Quantile-quantile plot** of subject-specific PSA residuals from two different joint models fitted to the PRIAS dataset. **Panel A**: model assuming a t-distribution (df=3) for the error term  $\varepsilon$  (see Equation 1). **Panel B**: model assuming a normal distribution for the error term  $\varepsilon$ . We selected the model with t-distributed error terms.

49 *Appendix A.2. PSA Dependent Biopsy Schedule of PRIAS, and Competing*  
 50 *Risks*

51 **PSA dependent interval censored time of upgrading:** The true  
 52 time of upgrading  $T_i^*$  is not known for any of the patients in PRIAS. In  
 53 order to detect upgrading, PRIAS uses a fixed schedule of biopsies wherein  
 54 biopsies are conducted at year one, year four, year seven and year ten of  
 55 follow-up, and every five years thereafter. However, PRIAS switches to a  
 56 more frequent annual biopsy schedule for faster-progressing patients. These  
 57 are patients with PSA doubling time (PSA-DT) between 0 and 10 years,  
 58 which is measured as the inverse of the slope of the regression line through  
 59 the base two logarithm of PSA values. Thus, the interval  $l_i < T_i^* \leq r_i$  in  
 60 which upgrading is detected depends on the observed PSA values.

61 **Competing events:** The primary event of interest in this paper is up-  
 62 grading observed via a positive biopsy. There are three types of competing  
 63 events, namely death, removal of patients from AS on the basis of their ob-  
 64 served DRE and PSA measurements, watchful-waiting, and loss to follow-up  
 65 of patients because of patient anxiety or unknown reasons.

66 The number of patients obtaining the event death is small compared to  
 67 the number of patients who obtain the primary event upgrading. Hence in  
 68 this paper considering death as non-informative censoring may be viable. We  
 69 also consider loss to follow-up as non-informative censoring, which may not  
 70 always be true. This is especially the case when the reason of loss to follow-up  
 71 is unknown. However, when the reason of loss to follow-up is patient anxiety,  
 72 it is often on the basis of their observed results. Given the large number of loss  
 73 to follow-up patients, considering these patients as censored is a limitation  
 74 of our work. However, the problem of unknown reason of dropout is not  
 75 specific to only our model. For the remaining patients who are removed from  
 76 AS on the basis their observed longitudinal data (e.g, treatment, watchful-  
 77 waiting), in the next paragraph we show that the removal of these patients  
 78 is non-informative about the parameters of the model for the true time of  
 79 upgrading.

Given the aforementioned issues of PSA dependent interval censoring and  
 removal of patients on the basis of their observed longitudinal data is natural  
 to question in this scenario if the parameters of the joint model are affected  
 by these two. However, because the parameters of the joint model are esti-  
 mated using a full likelihood approach [6], the joint model allows the schedule  
 of biopsies, as well as censoring to depend upon the observed PSA measure-  
 ments (e.g., via PSA-DT), under the condition that the model is correctly

specified. To show this, consider the following full general specification of the joint model that we use. Let  $\mathbf{y}_i$  denote the observed PSA measurements for the  $i$ -th patient, and  $l_i, r_i$  denote the two time points of the interval in which upgrading occurs for the  $i$ -th patient. In addition let  $T_i^S$  and  $\mathcal{V}_i$  denote the schedule of biopsies, and the schedule PSA measurements, respectively. Let  $G_i^*$  denote the time of removal from AS without observing upgrading. Under the assumption that  $T_i^S, G_i^*, \mathcal{V}_i$  may depend upon only the observed data  $\mathbf{y}_i$ , the joint likelihood of the various processes is given by:

$$p(\mathbf{y}_i, l_i, r_i, T_i^S, G_i^*, \mathcal{V}_i \mid \boldsymbol{\theta}, \boldsymbol{\psi}) = p(\mathbf{y}_i, l_i, r_i \mid \boldsymbol{\theta}) \times p(T_i^S, G_i^*, \mathcal{V}_i \mid \mathbf{y}_i, \boldsymbol{\psi}).$$

80 where,  $\boldsymbol{\psi}$  is the vector of parameters for the processes  $T_i^S, G_i^*, \mathcal{V}_i$ . From  
 81 this decomposition we can see that even if the processes  $T_i^S, G_i^*, \mathcal{V}_i$  may be  
 82 determined from  $\mathbf{y}_i$ , if we are interested in the parameters  $\boldsymbol{\theta}$  of the joint  
 83 distribution of longitudinal and event outcomes, we can maximize the like-  
 84 lihood based on the first term and ignore the second term. In other words,  
 85 the second term will not carry information for  $\boldsymbol{\theta}$ . Lastly, since we use a full  
 86 likelihood approach with an interval censoring specification, the estimates  
 87 that we obtain are consistent and asymptotically unbiased [7], despite the  
 88 interval censoring observed.



89 *Appendix A.3. Results*

90 Characteristics of the six validation cohorts from the GAP3 database [8]  
 91 are shown in Table 1, Table 2, and Table 3. The cause-specific cumulative  
 92 upgrading-risk in these cohorts is shown in Figure 3.

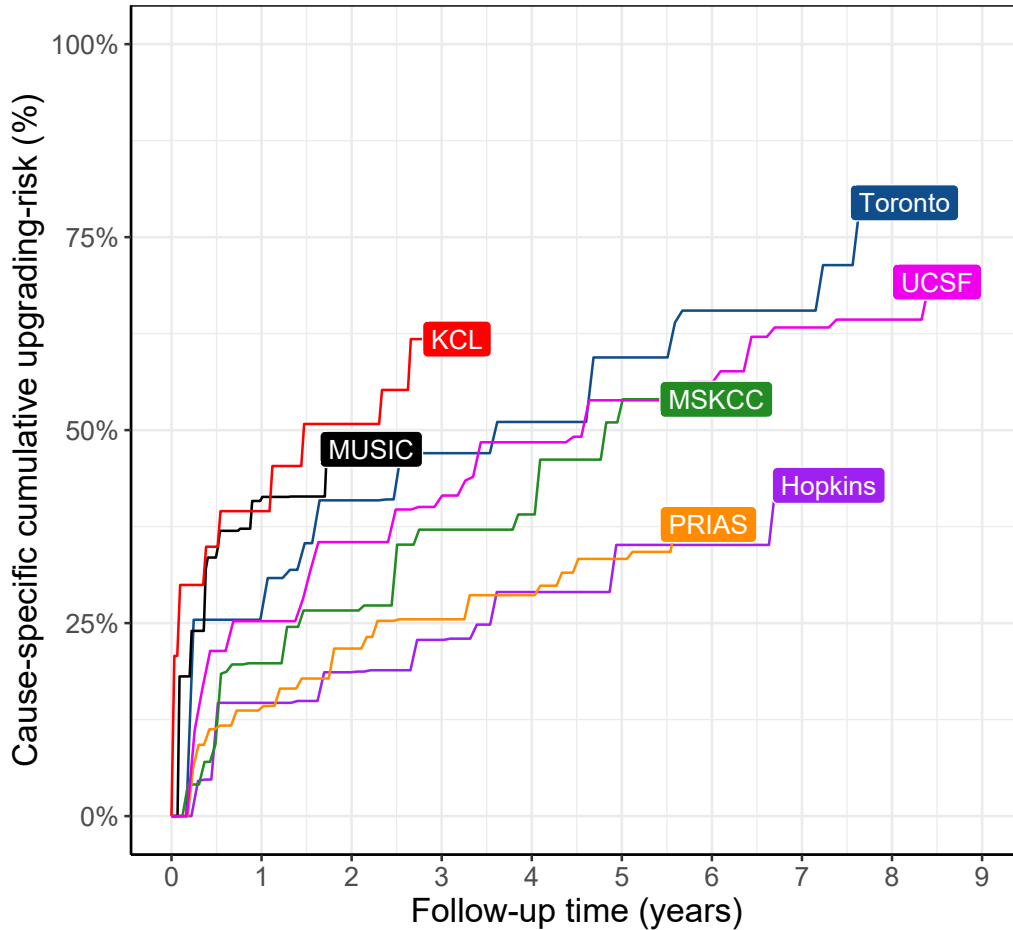

Figure 3: **Nonparametric estimate** [9] of the **cause-specific cumulative upgrading-risk** in the world’s largest AS cohort PRIAS, and largest six AS cohorts from the GAP3 database [8]. Abbreviations are *Hopkins*: Johns Hopkins Active Surveillance, *PRIAS*: Prostate Cancer International Active Surveillance, *Toronto*: University of Toronto Active Surveillance, *MSKCC*: Memorial Sloan Kettering Cancer Center Active Surveillance, *KCL*: King’s College London Active Surveillance, *MUSIC*: Michigan Urological Surgery Improvement Collaborative AS, *UCSF*: University of California San Francisco Active Surveillance.

Table 1: **Summary of the Hopkins and Toronto validation cohorts from the GAP3 database [8]**. The primary event of interest is upgrading, that is, increase in Gleason grade group from group 1 to 2 or higher. #PSA: number of PSA, #biopsies: number of biopsies, IQR: interquartile range, PSA: prostate-specific antigen. Full names of cohorts are *Hopkins*: Johns Hopkins Active Surveillance, *Toronto*: University of Toronto Active Surveillance

| <b>Characteristic</b>                        | <b>Hopkins</b>     | <b>Toronto</b>     |
|----------------------------------------------|--------------------|--------------------|
| Total patients                               | 1392               | 1046               |
| Upgrading (primary event)                    | 260                | 359                |
| Median age (years)                           | 62 (IQR: 66–69)    | 67 (IQR: 60–72)    |
| Median maximum follow-up per patient (years) | 3 (IQR: 1.3–5.8)   | 4.5 (IQR: 1.9–8.4) |
| Total PSA measurements                       | 11126              | 13984              |
| Median #PSA per patient                      | 6 (IQR: 4–11)      | 12 (IQR: 7–19)     |
| Median PSA (ng/mL)                           | 4.7 (IQR: 2.9–6.7) | 6 (IQR: 3.7–9.0)   |
| Total biopsies                               | 1926               | 909                |
| Median #biopsies per patient                 | 1 (IQR: 1–2)       | 1 (IQR: 1–2)       |

Table 2: **Summary of the MSKCC and UCSF validation cohorts from the GAP3 database [8]**. The primary event of interest is upgrading, that is, increase in Gleason grade group from group 1 to 2 or higher. #PSA: number of PSA, #biopsies: number of biopsies, IQR: interquartile range, PSA: prostate-specific antigen. Full names of cohorts are *MSKCC*: Memorial Sloan Kettering Cancer Center Active Surveillance, *UCSF*: University of California San Francisco Active Surveillance.

| <b>Characteristic</b>                        | <b>MSKCC</b>       | <b>UCSF</b>        |
|----------------------------------------------|--------------------|--------------------|
| Total patients                               | 894                | 1397               |
| Upgrading (primary event)                    | 242                | 547                |
| Median age (years)                           | 63 (IQR: 57–68)    | 63 (IQR: 57–68)    |
| Median maximum follow-up per patient (years) | 5.3 (IQR: 1.8–8.3) | 3.6 (IQR: 1.5–7.2) |
| Total PSA measurements                       | 10704              | 16093              |
| Median #PSA per patient                      | 11 (IQR: 5–17)     | 8 (IQR: 4–16)      |
| Median PSA (ng/mL)                           | 4.7 (IQR: 2.8–7.1) | 5.0 (IQR: 3.4–7.2) |
| Total biopsies                               | 1102               | 3512               |
| Median #biopsies per patient                 | 1 (IQR: 1–2)       | 2 (IQR: 2–3)       |

Table 3: **Summary of the MUSIC and KCL validation cohorts from the GAP3 database [8]**. The primary event of interest is upgrading, that is, increase in Gleason grade group from group 1 to 2 or higher. #PSA: number of PSA, #biopsies: number of biopsies, IQR: interquartile range, PSA: prostate-specific antigen. Full names of cohorts are *KCL*: King’s College London Active Surveillance, *MUSIC*: Michigan Urological Surgery Improvement Collaborative AS.

| Characteristic                               | MUSIC              | KCL                |
|----------------------------------------------|--------------------|--------------------|
| Total patients                               | 2743               | 616                |
| Upgrading (primary event)                    | 385                | 198                |
| Median age (years)                           | 65 (IQR: 60–71)    | 63 (IQR: 58–68)    |
| Median maximum follow-up per patient (years) | 1.2 (IQR: 0.6–2.2) | 2.4 (IQR: 1.3–3.8) |
| Total PSA measurements                       | 12087              | 2987               |
| Median #PSA per patient                      | 4 (IQR: 2–6)       | 4 (IQR: 2–6)       |
| Median PSA (ng/mL)                           | 5.1 (IQR: 3.4–7.1) | 6 (IQR: 4–9)       |
| Total biopsies                               | 1032               | 484                |
| Median #biopsies per patient                 | 1 (IQR: 1–1)       | 1 (IQR: 1–1)       |

Table 4: **Estimated variance-covariance matrix  $\mathbf{W}$**  of the random effects  $\mathbf{b} = (b_0, b_1, b_2, b_3, b_4)$  from the joint model fitted to the PRIAS dataset. The variances of the random effects are highlighted along the diagonal of the variance-covariance matrix.

| Random Effects | $b_0$        | $b_1$        | $b_2$        | $b_3$        | $b_4$        |
|----------------|--------------|--------------|--------------|--------------|--------------|
| $b_0$          | <b>0.229</b> | 0.030        | 0.023        | 0.073        | 0.007        |
| $b_1$          | 0.030        | <b>0.149</b> | 0.098        | 0.171        | 0.085        |
| $b_2$          | 0.023        | 0.098        | <b>0.276</b> | 0.335        | 0.236        |
| $b_3$          | 0.073        | 0.171        | 0.335        | <b>0.560</b> | 0.359        |
| $b_4$          | 0.007        | 0.085        | 0.236        | 0.359        | <b>0.351</b> |

93 The joint model was fitted using the R package **JMbayes** [10]. This  
 94 package utilizes the Bayesian methodology to estimate model parameters.  
 95 The corresponding posterior parameter estimates are shown in Table 5 (lon-  
 96 gitudinal sub-model for PSA outcome) and Table 6 (relative risk sub-model).  
 97 The parameter estimates for the variance-covariance matrix  $\mathbf{W}$  from the lon-  
 98 gitudinal sub-model for PSA are shown in the following Table 4:

99 For the PSA mixed effects sub-model parameter estimates (see Equa-  
 100 tion 1), in Table 5 we can see that the age of the patient trivially affects  
 101 the baseline  $\log_2(\text{PSA} + 1)$  measurement. Since the longitudinal evolution of  
 102  $\log_2(\text{PSA} + 1)$  measurements is modeled with non-linear terms, the interpre-  
 103 tation of the coefficients corresponding to time is not straightforward. In lieu  
 104 of the interpretation, in Figure 4 we present plots of observed versus fitted

Table 5: **Parameters of the longitudinal sub-model:** Estimated mean and 95% credible interval for parameters in Equation (1).

| Variable                 | Mean  | Std. Dev | 2.5%  | 97.5% | P      |
|--------------------------|-------|----------|-------|-------|--------|
| Intercept                | 2.129 | 0.060    | 2.009 | 2.244 | <0.001 |
| Age                      | 0.008 | 0.001    | 0.007 | 0.010 | <0.001 |
| Spline: [0.0, 0.5] years | 0.063 | 0.007    | 0.051 | 0.075 | <0.001 |
| Spline: [0.5, 1.3] years | 0.196 | 0.010    | 0.177 | 0.217 | <0.001 |
| Spline: [1.3, 3.0] years | 0.244 | 0.014    | 0.217 | 0.272 | <0.001 |
| Spline: [3.0, 6.3] years | 0.382 | 0.014    | 0.356 | 0.410 | <0.001 |
| $\sigma$                 | 0.139 | 0.001    | 0.138 | 0.140 |        |

Table 6: **Parameters of the relative risk sub-model:** Estimated mean and 95% credible interval for the parameters in Equation (2).

| Variable                                 | Mean   | Std. Dev | 2.5%   | 97.5% | P      |
|------------------------------------------|--------|----------|--------|-------|--------|
| Age                                      | 0.037  | 0.006    | 0.025  | 0.049 | <0.001 |
| Fitted $\log_2(\text{PSA} + 1)$ value    | -0.012 | 0.076    | -0.164 | 0.135 | 0.856  |
| Fitted $\log_2(\text{PSA} + 1)$ velocity | 2.266  | 0.299    | 1.613  | 2.767 | <0.001 |

105 PSA profiles for nine randomly selected patients.

106 For the relative risk sub-model (see Equation 2), the parameter estimates  
 107 in Table 6 show that  $\log_2(\text{PSA} + 1)$  velocity and age of the patient were  
 108 significantly associated with the hazard of upgrading.

109 It is important to note that since age, and  $\log_2(\text{PSA} + 1)$  value and ve-  
 110 locity are all measured on different scales, a comparison between the cor-  
 111 responding parameter estimates is not easy. To this end, in Table 7, we  
 112 present the hazard ratio of upgrading, for an increase in the aforementioned  
 113 variables from their 25-th to the 75-th percentile. For example, an increase  
 114 in fitted  $\log_2(\text{PSA} + 1)$  velocity from -0.085 to 0.308 (fitted 25-th and 75-th  
 115 percentiles) corresponds to a hazard ratio of 2.433. The interpretation of the  
 116 rest is similar.

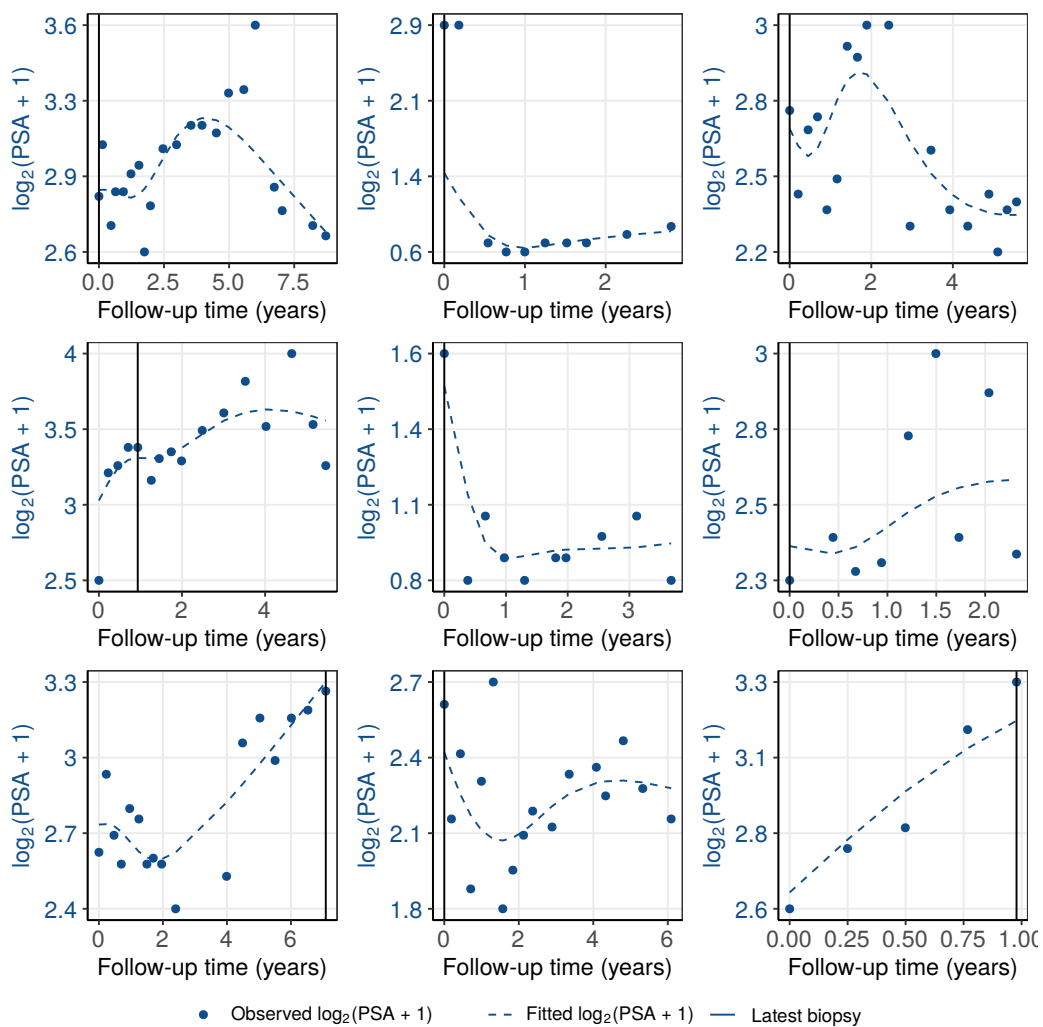

Figure 4: **Fitted versus observed  $\log_2(\text{PSA} + 1)$  profiles** for nine randomly selected PRIAS patients. The fitted profiles utilize information from the observed PSA measurements, and time of the latest biopsy.

Table 7: **Hazard ratio and 95% credible interval (CI) for upgrading:** Variables are on different scale and hence we compare an increase in the variables of relative risk sub-model from their 25-th percentile ( $P_{25}$ ) to their 75-th percentile ( $P_{75}$ ). Except for age, quartiles for all other variables are based on their fitted values obtained from the joint model fitted to the PRIAS dataset.

| Variable                                 | $P_{25}$ | $P_{75}$ | Hazard ratio [95% CI] |
|------------------------------------------|----------|----------|-----------------------|
| Age                                      | 61       | 71       | 1.455 [1.285, 1.631]  |
| Fitted $\log_2(\text{PSA} + 1)$ value    | 2.360    | 3.078    | 0.991 [0.889, 1.102]  |
| Fitted $\log_2(\text{PSA} + 1)$ velocity | -0.085   | 0.308    | 2.433 [1.883, 2.962]  |

Table 8: **Parameters of the relative risk sub-model in validation cohorts.** We fitted separate joint models for each of the six GAP3 validation cohorts as well. The specification of these joint models was same as that of the model for PRIAS. Two important predictors in the relative-risk sub-model, namely, the  $\log_2(\text{PSA} + 1)$  value and velocity have different impact on upgrading-risk across the cohorts. Table shows the mean estimate of these parameters with 95% credible interval in brackets. Strongest average effect of  $\log_2(\text{PSA} + 1)$  velocity is in PRIAS cohort, whereas the weakest is in MUSIC cohort. The strongest average effect of  $\log_2(\text{PSA} + 1)$  value is in the Toronto cohort whereas the weakest is in PRIAS cohort. Full names of cohorts are *Hopkins*: Johns Hopkins Active Surveillance, *PRIAS*: Prostate Cancer International Active Surveillance, *Toronto*: University of Toronto Active Surveillance, *MSKCC*: Memorial Sloan Kettering Cancer Center Active Surveillance, *KCL*: King's College London Active Surveillance, *MUSIC*: Michigan Urological Surgery Improvement Collaborative AS, *UCSF*: University of California San Francisco Active Surveillance.

| Cohort  | Fitted $\log_2(\text{PSA} + 1)$ value | Fitted $\log_2(\text{PSA} + 1)$ velocity |
|---------|---------------------------------------|------------------------------------------|
| PRIAS   | -0.012 [-0.164, 0.135]                | 2.266 [ 1.613, 2.767]                    |
| Hopkins | 0.061 [-0.323, 0.329]                 | 1.839 [ 0.761, 4.378]                    |
| MSKCC   | 0.336 [ 0.081, 0.583]                 | 1.122 [ 0.421, 1.980]                    |
| Toronto | 0.572 [ 0.347, 0.794]                 | 0.943 [ 0.464, 1.554]                    |
| UCSF    | 0.498 [ 0.326, 0.673]                 | 0.812 [ 0.280, 1.383]                    |
| MUSIC   | 0.441 [ 0.092, 0.767]                 | 0.029 [-0.552, 0.512]                    |
| KCL     | 0.194 [-0.104, 0.540]                 | 0.840 [-0.087, 1.665]                    |

## 117 Appendix B. Risk Predictions for Upgrading

Let us assume a new patient  $j$ , for whom we need to estimate the upgrading-risk. Let his current follow-up visit time be  $v$ , latest time of biopsy be  $t$ , observed vector PSA measurements be  $\mathcal{Y}_j(v)$ . The combined information from the observed data about the time of upgrading, is given by the following posterior predictive distribution  $g(T_j^*)$  of his time  $T_j^*$  of upgrading:

$$\begin{aligned} g(T_j^*) &= p\{T_j^* \mid T_j^* > t, \mathcal{Y}_j(v), \mathcal{A}_n\} \\ &= \int \int p(T_j^* \mid T_j^* > t, \mathbf{b}_j, \boldsymbol{\theta}) p\{\mathbf{b}_j \mid T_j^* > t, \mathcal{Y}_j(v), \boldsymbol{\theta}\} p(\boldsymbol{\theta} \mid \mathcal{A}_n) d\mathbf{b}_j d\boldsymbol{\theta}. \end{aligned}$$

118 The distribution  $g(T_j^*)$  depends not only depends on the observed data of the  
 119 patient  $T_j^* > t, \mathcal{Y}_j(v)$ , but also depends on the information from the PRIAS  
 120 dataset  $\mathcal{A}_n$ . To this the the posterior distribution of random effects  $\mathbf{b}_j$  and  
 121 posterior distribution of the vector of all parameters  $\boldsymbol{\theta}$  are utilized, respec-  
 122 tively. The distribution  $g(T_j^*)$  can be estimated as detailed in Rizopoulos  
 123 et al. [11]. Since, many prostate cancer patients may not obtain upgrading  
 124 in the current follow-up period of PRIAS,  $g(T_j^*)$  can only be estimated for a  
 125 currently limited follow-up period.

The cause-specific cumulative upgrading-risk can be derived from  $g(T_j^*)$  as given in [11]. It is given by:

$$R_j(u \mid t, v) = \Pr\{T_j^* > u \mid T_j^* > t, \mathcal{Y}_j(v), \mathcal{A}_n\}, \quad u \geq t. \quad (4)$$

126 The personalized risk profile of the patient (see Panel C, Figure 5) updates  
 127 as more data is gathered over follow-up visits.

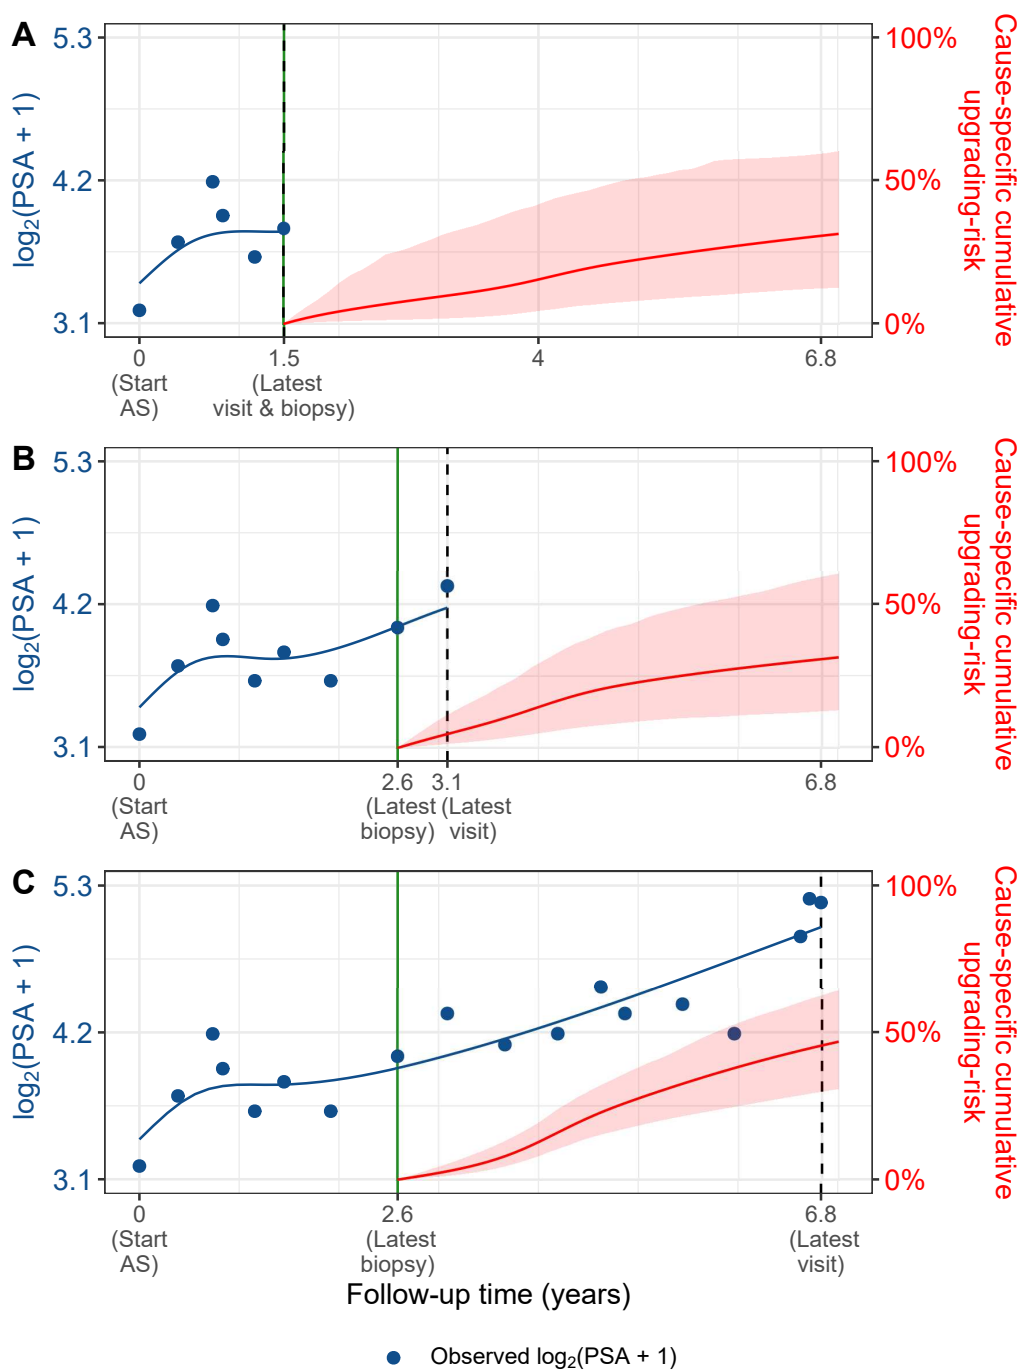

Figure 5: **Cause-specific cumulative upgrading-risk changing dynamically over follow-up** as more patient data is gathered. The three **Panels A,B and C**: are ordered by the time of the latest visit (dashed vertical black line) of a new patient. At each of the latest follow-up visits, we combine the accumulated PSA measurements (shown in blue), and latest time of negative biopsy (solid vertical green line) to obtain the updated cumulative-risk profile (shown in red) of the patient.



128 *Appendix B.1. Validation of Risk Predictions*

129 We wanted to check the usefulness of our model for not only the PRIAS  
 130 patients but also for patients from other cohorts. To this end, we validated  
 131 our model in the PRIAS dataset (internal validation) and the largest six co-  
 132 horts from the GAP3 database [8]. These are the University of Toronto AS  
 133 (Toronto), Johns Hopkins AS (Hopkins), Memorial Sloan Kettering Can-  
 134 cer Center AS (MSKCC), University of California San Francisco Active  
 135 Surveillance (UCSF), King’s College London AS (KCL), Michigan Urological  
 136 Surgery Improvement Collaborative AS (MUSIC).

**Calibration-in-the-large** We first assessed calibration-in-the-large [12]  
 of our model in the aforementioned cohorts. To this end, we used our model  
 to predict the cause-specific cumulative upgrading-risk for each patient, given  
 their PSA measurements and biopsy results. We then averaged the resulting  
 profiles of cause-specific cumulative upgrading-risk. Subsequently, we com-  
 pared the averaged cumulative-risk profile with a non-parametric estimate [9]  
 of the cause-specific cumulative upgrading-risk in each of the cohorts. The  
 results are shown in Panel A of Figure 6. We can see that our model is  
 miscalibrated in external cohorts, although it is fine in the Hopkins cohort.  
 To improve our model’s calibration in all cohorts, we recalibrated the base-  
 line hazard of the joint model fitted to the PRIAS dataset, individually for  
 each of the cohorts except the Hopkins cohort. More specifically, given the  
 data of an external cohort  $\mathcal{A}^c$ , where  $c$  denotes the cohort, the recalibrated  
 parameters  $\gamma_{h_0}^c$  (Appendix A) of the log baseline hazard are given by:

$$p(\gamma_{h_0}^c \mid \mathcal{A}^c, \mathbf{b}^c, \boldsymbol{\theta}) \propto \prod_{i=1}^{n^c} p(l_i^c, r_i^c \mid \mathbf{b}_i^c, \boldsymbol{\theta}) p(\gamma_{h_0}^c) \quad (5)$$

137 where  $n^c$  are the number of patients in the  $c$ -th cohort, and  $\boldsymbol{\theta}$  is the vector of  
 138 all parameters of the joint model fitted to the PRIAS dataset. The interval in  
 139 which upgrading is observed for the  $i$ -th patient is given by  $l_i^c, r_i^c$ , with  $r_i^c = \infty$   
 140 for right-censored patients. The symbol  $\mathbf{b}_i^c$  denotes patient-specific random  
 141 effects (Appendix A) in the  $c$ -th cohort. The random effects are obtained  
 142 using the joint model fitted to the PRIAS dataset before recalibration. We  
 143 re-evaluated the calibration-in-the-large of our model after the recalibration  
 144 of the baseline hazard individually for each cohort. The improved calibration-  
 145 in-the-large is shown in Panel B of Figure 6.

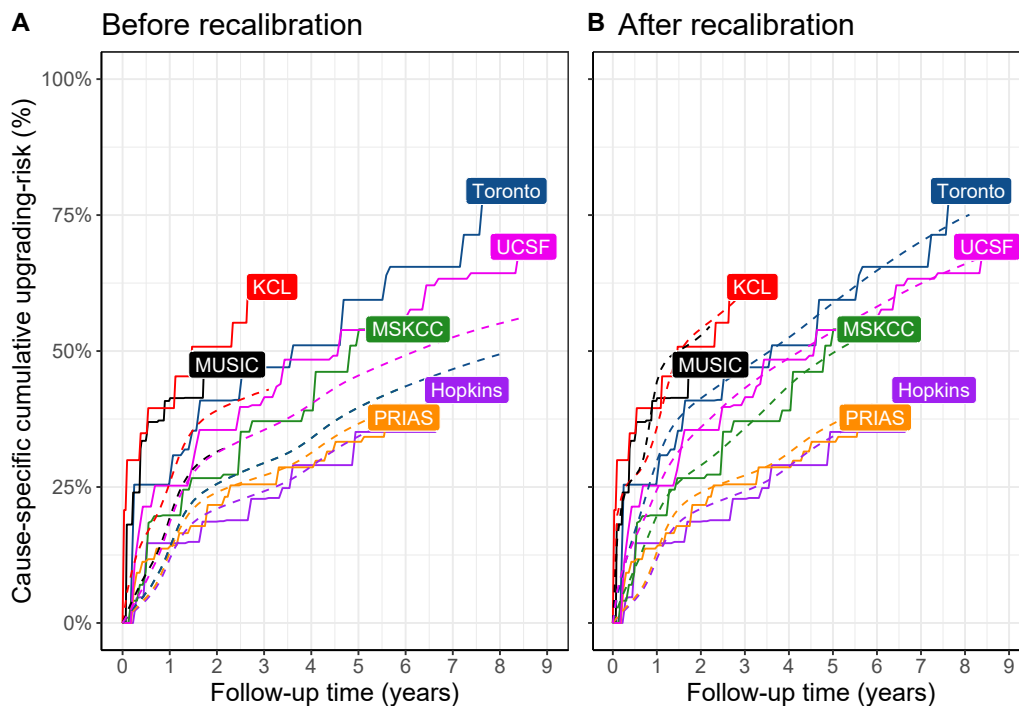

Figure 6: **Calibration-in-the-large of our model:** In **Panel A** we can see that our model is not well calibrated for use in KCL, MUSIC, Toronto and MSKCC. In **Panel B** we can see that calibration of model predictions improved in KCL, MUSIC, Toronto and MSKCC cohorts after recalibrating our model. Recalibration was not necessary for Hopkins cohort. Full names of Cohorts are *PRIAS*: Prostate Cancer International Active Surveillance, *Toronto*: University of Toronto Active Surveillance, *Hopkins*: Johns Hopkins Active Surveillance, *MSKCC*: Memorial Sloan Kettering Cancer Center Active Surveillance, *KCL*: King's College London Active Surveillance, *MUSIC*: Michigan Urological Surgery Improvement Collaborative Active Surveillance, *UCSF*: University of California San Francisco Active Surveillance.

146     ***Recalibrated PRIAS Model Versus Individual Joint Models***  
147 ***For Each Cohort*** We wanted to check if our recalibrated PRIAS model  
148 performed as good as a new joint model that could be fitted to the external  
149 cohorts. To this end, we predicted cause-specific cumulative upgrading-risk  
150 for each patient from each cohort using two sets of models, namely the recal-  
151 ibrated PRIAS model for each cohort, and a new joint model fitted to each  
152 cohort. The difference in predicted cause-specific cumulative upgrading-risk  
153 from these models is shown in Figure 7. We can see that the difference is  
154 smaller in those cohorts in which the effects of  $\log_2(\text{PSA} + 1)$  value and ve-  
155 locity were similar to that of PRIAS (Table 8). For example, the Hopkins  
156 cohort had parameter estimates similar to that of PRIAS, and consequently,  
157 the difference in predicted risks for this cohort is smallest. The opposite of  
158 this phenomenon holds for the MUSIC and KCL cohorts.

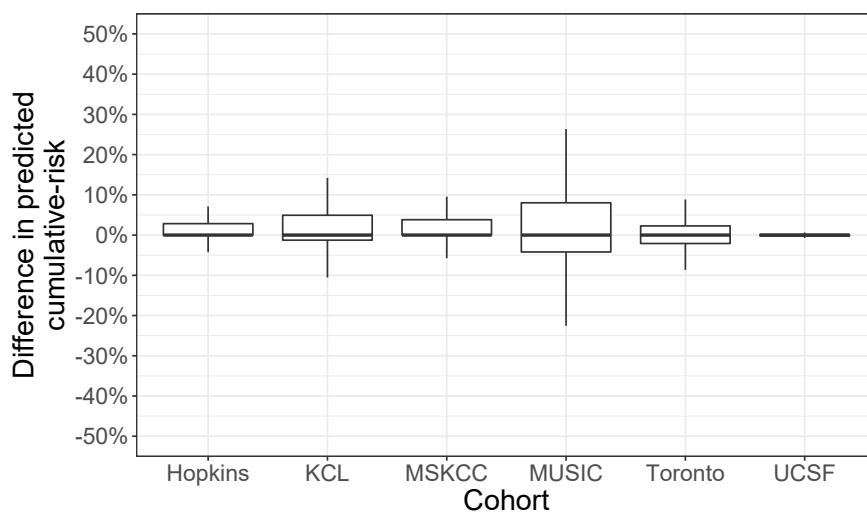

Figure 7: **Comparison of predictions from recalibrated PRIAS model with individual joint models fitted to external cohorts:** On Y-axis we show the difference between predicted cause-specific cumulative upgrading-risk for individual patients using two models, namely the recalibrated PRIAS model for each cohort, and individual joint model fitted to each cohort. The figure shows that the difference is smaller in those cohorts in which the effects of  $\log_2(\text{PSA} + 1)$  value and velocity were similar to that of PRIAS (Table 8). Full names of Cohorts are *PRIAS*: Prostate Cancer International Active Surveillance, *Toronto*: University of Toronto Active Surveillance, *Hopkins*: Johns Hopkins Active Surveillance, *MSKCC*: Memorial Sloan Kettering Cancer Center Active Surveillance, *KCL*: King’s College London Active Surveillance, *MUSIC*: Michigan Urological Surgery Improvement Collaborative Active Surveillance, *UCSF*: University of California San Francisco Active Surveillance.

159 ***Validation of Dynamic Cumulative-Risk Predictions*** As shown  
 160 in Figure 5, the cumulative-risk predictions from the joint model are dynamic  
 161 in nature. That is, they update as more data becomes available over time.  
 162 Consequently, the discrimination and prediction error of the joint model also  
 163 depend on the available data. We assessed these two measures dynamically in  
 164 the PRIAS cohort (interval validation) and in the largest six external cohorts  
 165 that are part of the GAP3 database. For discrimination, we utilized the time-  
 166 varying area under the receiver operating characteristic curve or time-varying  
 167 AUC [11]. For time-varying prediction error, we assessed the mean absolute  
 168 prediction error or MAPE [11]. The AUC indicates how well the model  
 169 discriminates between patients who experience upgrading, and those do not.  
 170 The MAPE indicates how accurately the model predicts upgrading. Both  
 171 AUC and MAPE are restricted to  $[0, 1]$ . However, it is preferred that AUC  
 172  $> 0.5$  because an AUC  $\leq 0.5$  indicates that the model performs worse than  
 173 random discrimination. Ideally, MAPE should be 0.

174 We calculate AUC and MAPE in a time-dependent manner. More specif-  
 175 ically, given the time of latest biopsy  $t$ , and history of PSA measurements up  
 176 to time  $v$ , we calculate AUC and MAPE for a medically relevant time frame  
 177  $(t, v]$ , within which the occurrence of upgrading is of interest. In the case of  
 178 prostate cancer, at any point in time  $v$ , it is of interest to identify patients  
 179 who may have experienced upgrading in the last one year  $(v - 1, v]$ . That  
 180 is, we set  $t = v - 1$ . We then calculate AUC and MAPE at a gap of every  
 181 six months (follow-up schedule of PRIAS). That is,  $v \in \{1, 1.5, \dots\}$  years. To  
 182 obtain reliable estimates of AUC and MAPE, in each cohort, we restrict  $v$  to  
 183 a maximum time point  $v_{\max}$ , such that there are at least ten patients who  
 184 experience upgrading after  $v_{\max}$ . This maximum time point  $v_{\max}$  differs  
 185 between cohorts, and is given in Table 9.

186 The results for estimates of AUC and MAPE are summarized in Figure 8,  
 187 and in Table 10 to Table 16. Results are based on the recalibrated PRIAS  
 188 model for the GAP3 cohorts. The results show that AUC remains more or  
 189 less constant in all cohorts as more data becomes available for patients. The  
 190 AUC obtains a moderate value, roughly between 0.5 and 0.7 for all cohorts.  
 191 On the other hand, MAPE reduces by a big margin after year one of follow-  
 192 up. This could be because of two reasons. Firstly, MAPE at year one is  
 193 based only on four PSA measurements gathered in the first year of follow-  
 194 up, whereas after year one number of PSA measurements increases. Secondly,  
 195 patients in year one consist of two sub-populations, namely patients with a  
 196 correct Gleason grade group 1 at the time of inclusion in AS, and patients

Table 9: **Maximum follow-up period up to which we can reliably predict upgrading-risk.** In each cohort, this time point is chosen such that there are at least 10 patients who experience upgrading after this time point. Full names of Cohorts are *PRIAS*: Prostate Cancer International Active Surveillance, *Toronto*: University of Toronto Active Surveillance, *Hopkins*: Johns Hopkins Active Surveillance, *MSKCC*: Memorial Sloan Kettering Cancer Center Active Surveillance, *KCL*: King's College London Active Surveillance, *MUSIC*: Michigan Urological Surgery Improvement Collaborative Active Surveillance, *UCSF*: University of California San Francisco Active Surveillance.

| Cohort  | Maximum Prediction Time (years) |
|---------|---------------------------------|
| PRIAS   | 6                               |
| KCL     | 3                               |
| MUSIC   | 2                               |
| Toronto | 8                               |
| MSKCC   | 6                               |
| Hopkins | 7                               |
| UCSF    | 8.5                             |

197 who probably had Gleason grade group 2 at inclusion but were misclassified  
 198 by the urologist as Gleason grade group 1 patients. To remedy this problem,  
 199 a biopsy for all patients at year one is commonly recommended in all AS  
 200 programs [13].

Table 10: **Internal validation of predictions of upgrading in PRIAS cohort.** The area under the receiver operating characteristic curve or AUC (measure of discrimination) and mean absolute prediction error or MAPE are calculated over the follow-up period at a gap of 6 months. In addition bootstrapped 95% confidence intervals (CI) are also presented.

| Follow-up period (years) | AUC (95% CI)         | MAPE (95%CI)         |
|--------------------------|----------------------|----------------------|
| 1.0 to 2.0               | 0.661 [0.647, 0.678] | 0.187 [0.183, 0.191] |
| 1.5 to 2.5               | 0.647 [0.596, 0.688] | 0.129 [0.122, 0.140] |
| 2.0 to 3.0               | 0.683 [0.642, 0.723] | 0.135 [0.125, 0.146] |
| 2.5 to 3.5               | 0.692 [0.632, 0.748] | 0.118 [0.111, 0.128] |
| 3.0 to 4.0               | 0.657 [0.603, 0.709] | 0.086 [0.080, 0.092] |
| 3.5 to 4.5               | 0.623 [0.582, 0.660] | 0.111 [0.105, 0.116] |
| 4.0 to 5.0               | 0.619 [0.582, 0.654] | 0.126 [0.118, 0.131] |
| 4.5 to 5.5               | 0.624 [0.537, 0.711] | 0.119 [0.103, 0.135] |
| 5.0 to 6.0               | 0.639 [0.582, 0.696] | 0.121 [0.103, 0.138] |

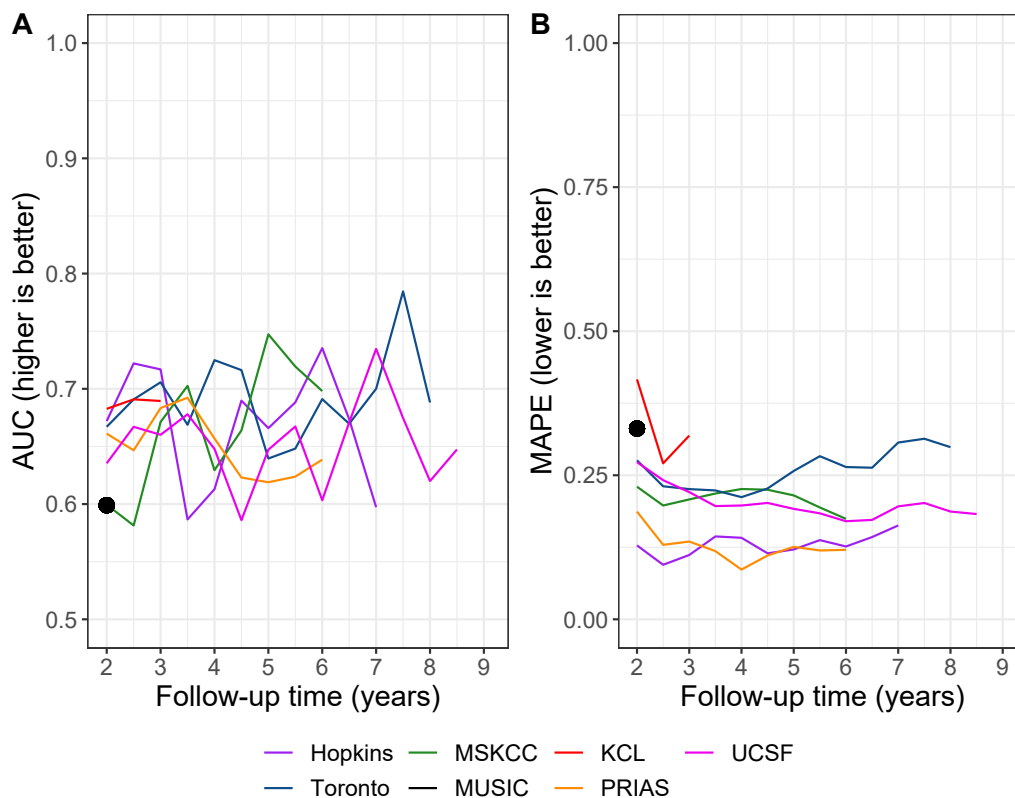

Figure 8: **Validation of dynamic predictions of cause-specific cumulative upgrading-risk.** In **Panel A** area under the receiver operating characteristic curve or AUC (measure of discrimination) is between 0.6 and 0.7. **Panel B** we can see that the time dependent root mean squared prediction error or MAPE is similar for PRIAS and Hopkins cohorts. The bootstrapped 95% confidence interval for these estimates are presented in Table 10 to Table 15. Full names of Cohorts are *PRIAS*: Prostate Cancer International Active Surveillance, *Toronto*: University of Toronto Active Surveillance, *Hopkins*: Johns Hopkins Active Surveillance, *MSKCC*: Memorial Sloan Kettering Cancer Center Active Surveillance, *KCL*: King's College London Active Surveillance, *MUSIC*: Michigan Urological Surgery Improvement Collaborative Active Surveillance, *UCSF*: University of California San Francisco Active Surveillance.

Table 11: **External validation of predictions of upgrading in University of Toronto Active Surveillance cohort.** The area under the receiver operating characteristic curve or AUC (measure of discrimination) and mean absolute prediction error or MAPE are calculated over the follow-up period at a gap of 6 months. In addition bootstrapped 95% confidence intervals (CI) are also presented.

| Follow-up period (years) | AUC (95% CI)         | MAPE (95%CI)         |
|--------------------------|----------------------|----------------------|
| 1.0 to 2.0               | 0.667 [0.634, 0.712] | 0.276 [0.259, 0.296] |
| 1.5 to 2.5               | 0.691 [0.651, 0.730] | 0.231 [0.205, 0.254] |
| 2.0 to 3.0               | 0.706 [0.637, 0.762] | 0.226 [0.196, 0.260] |
| 2.5 to 3.5               | 0.669 [0.586, 0.741] | 0.224 [0.195, 0.258] |
| 3.0 to 4.0               | 0.725 [0.649, 0.806] | 0.212 [0.184, 0.238] |
| 3.5 to 4.5               | 0.716 [0.642, 0.793] | 0.227 [0.206, 0.258] |
| 4.0 to 5.0               | 0.640 [0.579, 0.717] | 0.257 [0.222, 0.312] |
| 4.5 to 5.5               | 0.648 [0.579, 0.740] | 0.283 [0.247, 0.326] |
| 5.0 to 6.0               | 0.691 [0.608, 0.793] | 0.264 [0.232, 0.302] |
| 5.5 to 6.5               | 0.670 [0.543, 0.776] | 0.263 [0.227, 0.307] |
| 6.0 to 7.0               | 0.700 [0.544, 0.851] | 0.307 [0.258, 0.363] |
| 6.5 to 7.5               | 0.785 [0.640, 0.866] | 0.313 [0.272, 0.360] |
| 7.0 to 8.0               | 0.688 [0.532, 0.786] | 0.299 [0.249, 0.361] |

Table 12: **External validation of predictions of upgrading in University of California San Francisco Active Surveillance cohort.** The area under the receiver operating characteristic curve or AUC (measure of discrimination) and mean absolute prediction error or MAPE are calculated over the follow-up period at a gap of 6 months. In addition bootstrapped 95% confidence intervals (CI) are also presented.

| Follow-up period (years) | AUC (95% CI)         | MAPE (95%CI)         |
|--------------------------|----------------------|----------------------|
| 1.0 to 2.0               | 0.635 [0.595, 0.677] | 0.273 [0.266, 0.281] |
| 1.5 to 2.5               | 0.667 [0.628, 0.715] | 0.241 [0.224, 0.259] |
| 2.0 to 3.0               | 0.660 [0.600, 0.713] | 0.221 [0.205, 0.238] |
| 2.5 to 3.5               | 0.678 [0.614, 0.757] | 0.197 [0.175, 0.214] |
| 3.0 to 4.0               | 0.648 [0.574, 0.707] | 0.197 [0.179, 0.221] |
| 3.5 to 4.5               | 0.586 [0.525, 0.638] | 0.202 [0.180, 0.229] |
| 4.0 to 5.0               | 0.647 [0.590, 0.754] | 0.192 [0.168, 0.217] |
| 4.5 to 5.5               | 0.667 [0.582, 0.773] | 0.184 [0.159, 0.220] |
| 5.0 to 6.0               | 0.603 [0.496, 0.696] | 0.170 [0.144, 0.207] |
| 5.5 to 6.5               | 0.671 [0.576, 0.786] | 0.173 [0.145, 0.202] |
| 6.0 to 7.0               | 0.735 [0.663, 0.794] | 0.196 [0.166, 0.219] |
| 6.5 to 7.5               | 0.675 [0.565, 0.769] | 0.202 [0.168, 0.231] |
| 7.0 to 8.0               | 0.620 [0.518, 0.740] | 0.187 [0.144, 0.217] |
| 7.5 to 8.5               | 0.647 [0.538, 0.787] | 0.183 [0.146, 0.222] |



Table 13: **External validation of predictions of upgrading in Johns Hopkins Active Surveillance cohort.** The area under the receiver operating characteristic curve or AUC (measure of discrimination) and mean absolute prediction error or MAPE are calculated over the follow-up period at a gap of 6 months. In addition bootstrapped 95% confidence intervals (CI) are also presented.

| Follow-up period (years) | AUC (95% CI)         | MAPE (95%CI)         |
|--------------------------|----------------------|----------------------|
| 1.0 to 2.0               | 0.672 [0.604, 0.744] | 0.128 [0.115, 0.141] |
| 1.5 to 2.5               | 0.722 [0.652, 0.792] | 0.095 [0.081, 0.111] |
| 2.0 to 3.0               | 0.717 [0.638, 0.777] | 0.112 [0.100, 0.123] |
| 2.5 to 3.5               | 0.587 [0.493, 0.704] | 0.144 [0.129, 0.154] |
| 3.0 to 4.0               | 0.613 [0.486, 0.742] | 0.141 [0.126, 0.156] |
| 3.5 to 4.5               | 0.690 [0.594, 0.783] | 0.115 [0.100, 0.133] |
| 4.0 to 5.0               | 0.666 [0.572, 0.754] | 0.121 [0.104, 0.147] |
| 4.5 to 5.5               | 0.688 [0.519, 0.779] | 0.137 [0.119, 0.161] |
| 5.0 to 6.0               | 0.735 [0.676, 0.820] | 0.126 [0.102, 0.152] |
| 5.5 to 6.5               | 0.674 [0.581, 0.765] | 0.143 [0.121, 0.172] |
| 6.0 to 7.0               | 0.597 [0.472, 0.712] | 0.163 [0.126, 0.195] |

Table 14: **External validation of predictions of upgrading in Memorial Sloan Kettering Cancer Center Active Surveillance cohort.** The area under the receiver operating characteristic curve or AUC (measure of discrimination) and mean absolute prediction error or MAPE are calculated over the follow-up period at a gap of 6 months. In addition bootstrapped 95% confidence intervals (CI) are also presented.

| Follow-up period (years) | AUC (95% CI)         | MAPE (95%CI)         |
|--------------------------|----------------------|----------------------|
| 1.0 to 2.0               | 0.599 [0.518, 0.671] | 0.230 [0.207, 0.256] |
| 1.5 to 2.5               | 0.581 [0.504, 0.663] | 0.198 [0.168, 0.235] |
| 2.0 to 3.0               | 0.671 [0.599, 0.741] | 0.208 [0.182, 0.232] |
| 2.5 to 3.5               | 0.703 [0.610, 0.777] | 0.218 [0.197, 0.246] |
| 3.0 to 4.0               | 0.629 [0.499, 0.706] | 0.226 [0.194, 0.259] |
| 3.5 to 4.5               | 0.664 [0.589, 0.756] | 0.225 [0.199, 0.262] |
| 4.0 to 5.0               | 0.747 [0.642, 0.841] | 0.215 [0.188, 0.247] |
| 4.5 to 5.5               | 0.719 [0.597, 0.852] | 0.194 [0.165, 0.232] |
| 5.0 to 6.0               | 0.698 [0.565, 0.792] | 0.174 [0.136, 0.227] |

Table 15: **External validation of predictions of upgrading in King's College London Active Surveillance cohort.** The area under the receiver operating characteristic curve or AUC (measure of discrimination) and mean absolute prediction error or MAPE are calculated over the follow-up period at a gap of 6 months. In addition bootstrapped 95% confidence intervals (CI) are also presented.

| Follow-up period (years) | AUC (95% CI)         | MAPE (95%CI)         |
|--------------------------|----------------------|----------------------|
| 1.0 to 2.0               | 0.683 [0.604, 0.753] | 0.416 [0.396, 0.445] |
| 1.5 to 2.5               | 0.691 [0.621, 0.766] | 0.271 [0.246, 0.297] |
| 2.0 to 3.0               | 0.689 [0.616, 0.785] | 0.319 [0.282, 0.344] |

Table 16: **External validation of predictions of upgrading in Michigan Urological Surgery Improvement Collaborative Active Surveillance cohort.** The area under the receiver operating characteristic curve or AUC (measure of discrimination) and mean absolute prediction error or MAPE are calculated over the follow-up period at a gap of 6 months. In addition bootstrapped 95% confidence intervals (CI) are also presented.

| Follow-up period (years) | AUC (95% CI)         | MAPE (95%CI)         |
|--------------------------|----------------------|----------------------|
| 1.0 to 2.0               | 0.599 [0.553, 0.632] | 0.331 [0.317, 0.348] |

201 **Appendix C. Personalized Biopsies Based on Cause-Specific Cu-**  
 202 **mulative Upgrading-Risk**

203 Consider some real patients from the PRIAS database shown in Fig-  
 204 ure 10– 12. In line with the protocols of most AS cohorts [14], we first  
 205 schedule a compulsory biopsy at year one of follow-up. This promises early  
 206 detection of Gleason upgrade for patients misdiagnosed as low-grade cancer  
 207 patients or patients who chose AS despite having a higher grade at diagnosis.  
 208 We also maintain a recommended minimum gap of one year between consec-  
 209 utive biopsies [13]. That is, we intend to develop a personalized schedule of  
 210 biopsies for these patients starting from the second year. The added benefit  
 211 of planning biopsies year two onwards is that due to the longitudinal mea-  
 212 surements accumulated over two years, and year one biopsy results, we are  
 213 able to make reasonably accurate predictions of the cause-specific cumulative  
 214 upgrading-risk.

Using the joint model fitted to the PRIAS dataset, we first obtain a pa-  
 tient’s cause-specific cumulative upgrading-risk over the entire future follow-  
 up period (see 4), given their accumulated two year clinical data. Typically  
 biopsies may be decided on the same visit on which PSA is measured. Let  
 $U = u_1, \dots, u_L$  represent a schedule of such visits (e.g., every six months in  
 prostate cancer for PSA measurement), where  $u_1 = v$  is also the time of the  
 current visit, and  $u_L$  is the horizon up to which we intend to plan biopsies.  
 Depending upon how much training/validation data is available, this horizon  
 differs between cohorts (Table 17). First, we make  $L$  successive decisions for  
 conducting biopsies on each of the  $L$  future visit times  $u_l \in U$ . Specifically,  
 we decide to conduct a biopsy at time  $u_l$  if the conditional cumulative-risk  
 of upgrading at  $u_l$  is larger than a certain risk threshold  $0 \leq \kappa \leq 1$  (e.g.,  
 $\kappa = 12\%$  risk as shown in Figure 9). If a biopsy gets planned at time  $u_l$ ,  
 then the successive biopsy decision at time  $u_{l+1}$  is made using an updated  
 cumulative-risk profile. This updated cumulative-risk profile accounts for  
 the possibility that upgrading may occur after time  $u_l < T_j^*$ . The biopsy  
 decisions on each future visit time  $u_l$  are defined as:

$$Q_j^\kappa(u_l | t_l, v) = I\{R_j(u_l | t_l, v) \geq \kappa\},$$

$$t_l = \left\{ \begin{array}{ll} t, & \text{if } l = 1 \\ t_{l-1}, & \text{if } Q_j^\kappa(u_{l-1} | t_{l-1}, v) = 0, l \geq 2 \\ u_{l-1}, & \text{if } Q_j^\kappa(u_{l-1} | t_{l-1}, v) = 1, l \geq 2 \end{array} \right\}.$$

The cumulative-risk  $R_j(u_l | t_l, v)$  at future visit time  $u_l$  utilizes the time  $t_l$

as the time of the last conducted biopsy on which upgrading may not be observed. However, the contribution of the observed longitudinal data  $\mathcal{Y}_j(v)$  in the risk function remains the same over all time points in  $U$ . The biopsy decision at time  $u_l$  is denoted by  $Q_j^k(u_l | t_l, v)$ . Via the indicator function  $I(\cdot)$  it obtains a value 1 (or 0) when a biopsy is to be conducted (or not conducted) at time  $u_l$ . The subset of future time points in  $U$  on which a biopsy is to be performed results into a personalized schedule of planned future biopsies, given by:

$$S_j^k(U | t, v) = \{u_l \in U | Q_j^k(u_l | t_l, v) = 1\}. \quad (6)$$

215 The personalized schedule in (6) is updated as more patient data becomes  
216 available over subsequent follow-up visits.

217 *Appendix C.1. Expected Time Delay in Detecting Upgrading*

218 The schedule  $S_j^k(U | t, v)$  manifests a personalized biopsy plan for the  
219  $j$ -the patient. However, the time delay in detecting upgrading that may  
220 subsequently be observed depends on the true time of upgrading  $T_j^*$  of the  
221 patient. Since two different patients with the same timing of biopsies will  
222 expect different time delays, we estimate it in a patient-specific manner as  
223 well. Although, this calculation is not limited to personalized schedules only,  
224 but can be done for any schedule  $S$  of biopsies with  $N$  time points  $S = \{s_n |$   
225  $n = 1, \dots, N\}$ .

For each of the  $N$  planned biopsies there exist  $N$  possible time intervals  $s_{n-1} < T_j^* \leq s_n$  in which upgrading may be observed. Correspondingly, there are  $N$  possible time delays in detecting upgrading  $s_n - T_j^*$ . Given a schedule  $S$ , the true time delay in detecting upgrading  $D_j$  that the patient will experience can be defined as:

$$D_j(S | t) = \left\{ \begin{array}{ll} s_1 - T_j^*, & \text{if } t < T_j^* \leq s_1 \\ \dots & \\ s_N - T_j^*, & \text{if } s_{N-1} < T_j^* \leq s_N \end{array} \right\}. \quad (7)$$

The time delay is cannot be defined for the scenario in which the patient obtains upgrading after the time of the last biopsy in the schedule  $T_j^* > s_N$ . Hence, this delay should be interpreted as the delay that will be observed if the patient will experience upgrading before time of the last planned biopsy at  $T_j^* \leq s_N$ . To estimate the expected value of  $D_j(\cdot)$  in a patient-specific manner, we exploit the personalized cumulative-risk profile of the patient

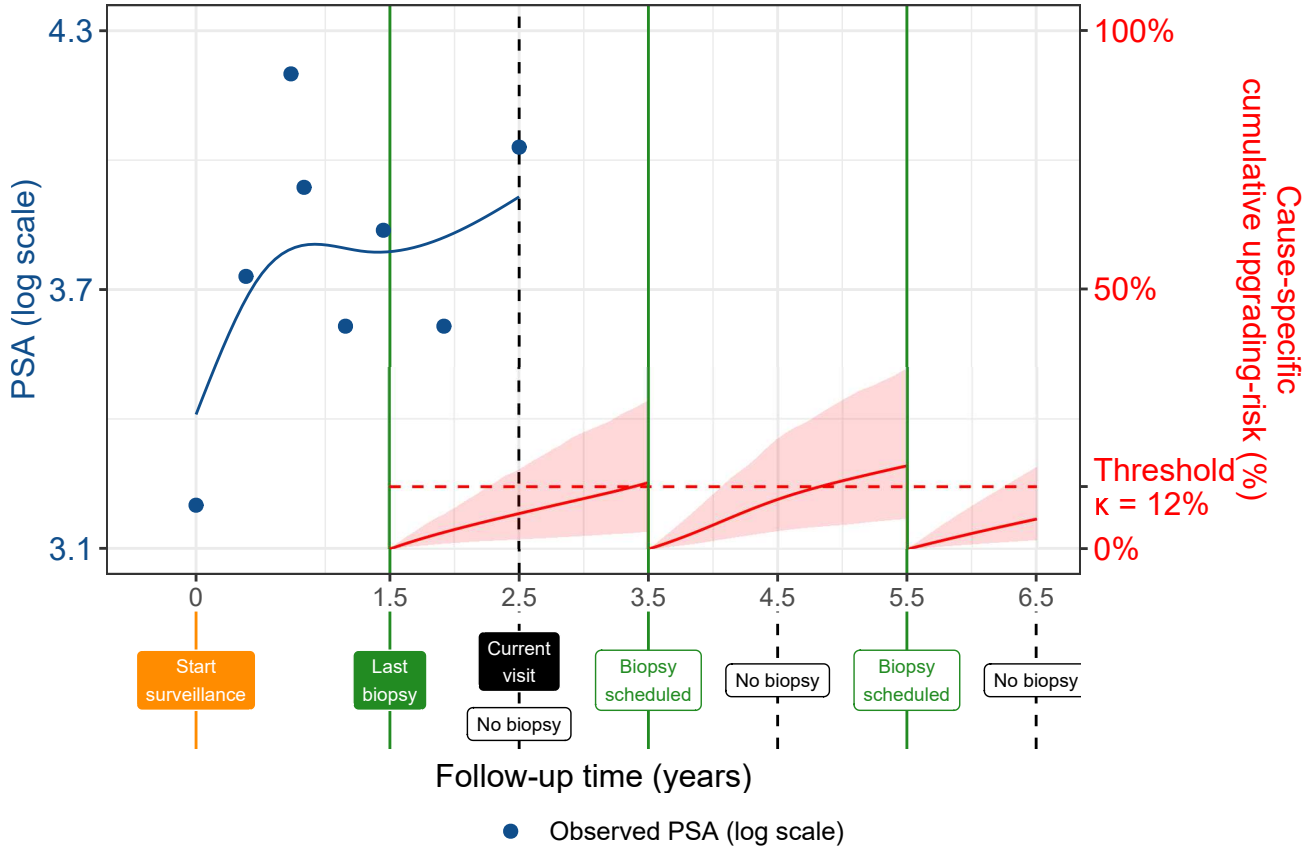

Figure 9: **Illustration of Personalized Biopsy Decisions Using Patient-specific Conditional Cumulative Upgrading-risk.** The last biopsy on which upgrading was not observed was conducted at  $t = 1.5$  years. The current visit time of the patient is  $v = 2.5$  years. Decisions for biopsy need to be made at a gap of every one year starting from the current visit until a horizon of 6.5 years. That is,  $U = \{2.5, 3.5, 4.5, 5.5, 6.5\}$  years. Based on an example risk threshold of 12% ( $\kappa = 0.12$ ) the future biopsy decisions at time points in  $U$  lead to a personalized schedule  $S_j^{\kappa^*}(U | t = 1.5, v = 2.5) = \{3.5, 5.5\}$  years. The conditional cumulative-risk profiles  $R_j(u_l | t_l, v)$  employed in (Appendix C) are shown with red line (confidence interval shaded). It is called ‘conditional’ because, for example, the second biopsy at future time 5.5 years, is scheduled after accounting for the possibility that upgrading (true time  $T_j^*$ ) may not have occurred until the time of the previously scheduled biopsy at time  $T_j^* > 3.5$  years. All values are illustrative.

defined in (4). Specifically, the expected time delay  $E\{D_j(\cdot)\}$  can be calculated as the weighted sum of  $N$  possible time delays defined in (7). The  $n$ -th weight is equal to the probability of the patient obtaining upgrading in the  $n$ -th interval  $s_{n-1} < T_j^* \leq s_n$ .

$$E\{D_j(S | t)\} = \sum_{n=1}^N \left\{ s_n - E(T_j^* | s_{n-1}, s_n, v) \right\} \\ \times \Pr\left\{ s_{n-1} < T_j^* \leq s_n \mid T_j^* \leq s_N, \mathcal{Y}_j(v), \mathcal{A}_n \right\}, \quad s_0 = t$$

$$E(T_j^* | s_{n-1}, s_n, v) = s_{n-1} + \int_{s_{n-1}}^{s_n} \Pr\left\{ T_j^* \geq u \mid s_{n-1} < T_j^* \leq s_n, \mathcal{Y}_j(v), \mathcal{A}_n \right\} du,$$

226 where  $E(T_j^* | s_{n-1}, s_n, v)$  denotes the conditional expected time of upgrading  
 227 for the scenario  $s_{n-1} < T_j^* \leq s_n$ , and is calculated as the area under the  
 228 corresponding survival curve.

229 The personalized expected time delay in detecting upgrading has the  
 230 advantage that it is updated over follow-up as more patient data become  
 231 available. Since it can be calculated for any schedule, patients and doctors  
 232 can utilize it along with the plan of biopsies to compare schedules before  
 233 making a decision. Although, in order to have a fair comparison of time  
 234 delays between different schedules for the same patient, a compulsory biopsy  
 235 at a common horizon time point should be planned in all schedules.

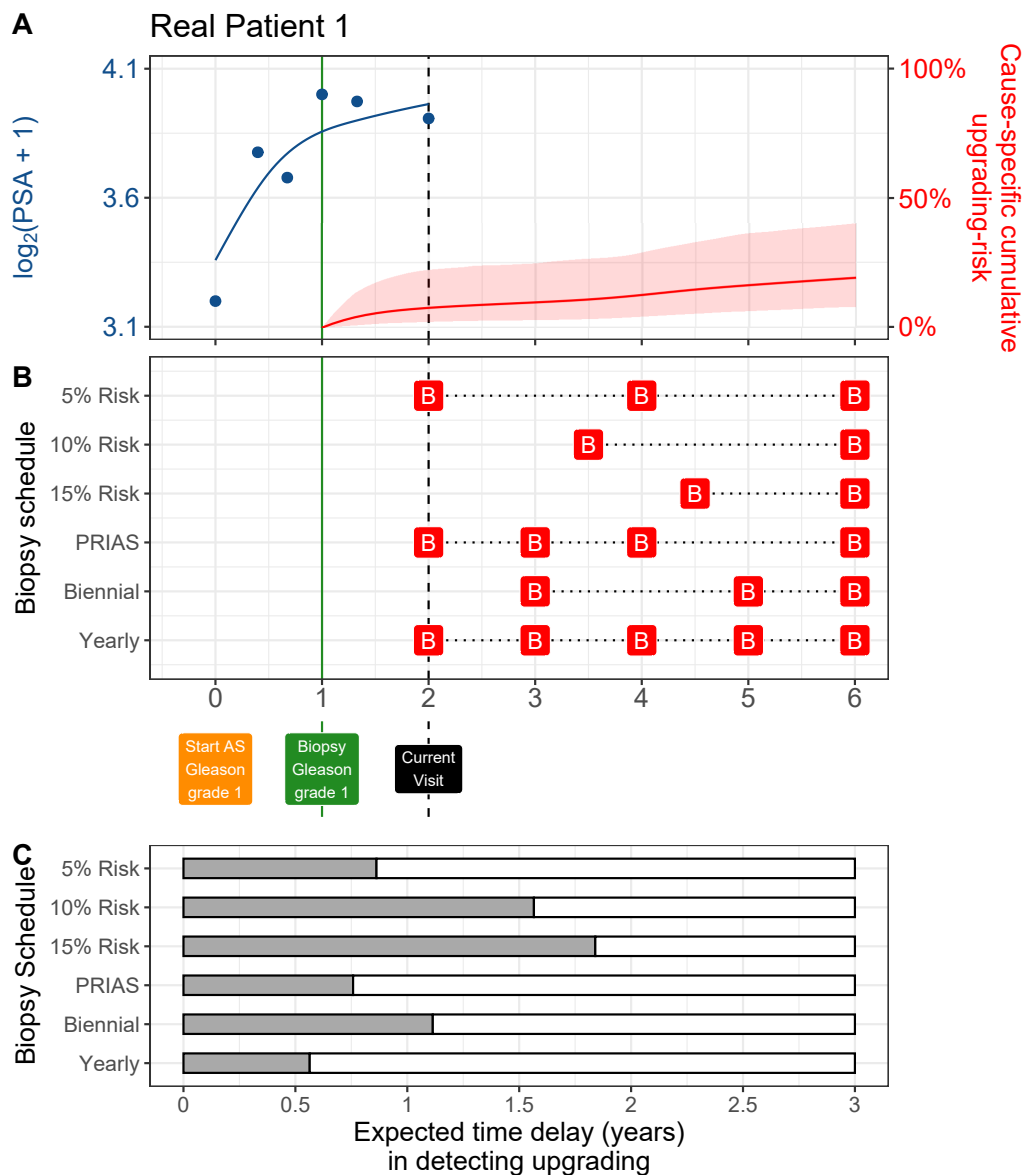

Figure 10: **Personalized and fixed schedules of biopsies for patient 1.** **Panel A:** shows the observed and fitted  $\log_2(\text{PSA} + 1)$  measurements (Equation 1), and the dynamic cause-specific cumulative upgrading-risk (see Appendix B) over follow-up period. **Panel B** shows the personalized and fixed schedules of biopsies with a ‘B’ indicating times of biopsies. Smaller risk thresholds lead to more frequently planned biopsies. **Panel C** various schedules are compared in terms of the expected time delay in detecting upgrading (years) if patient progresses before year six. The maximum time delay with limited adverse consequences is three years [15]. A compulsory biopsy was scheduled at year six (maximum biopsy scheduling time in PRIAS, Table 17) in all schedules for a meaningful comparison between them.

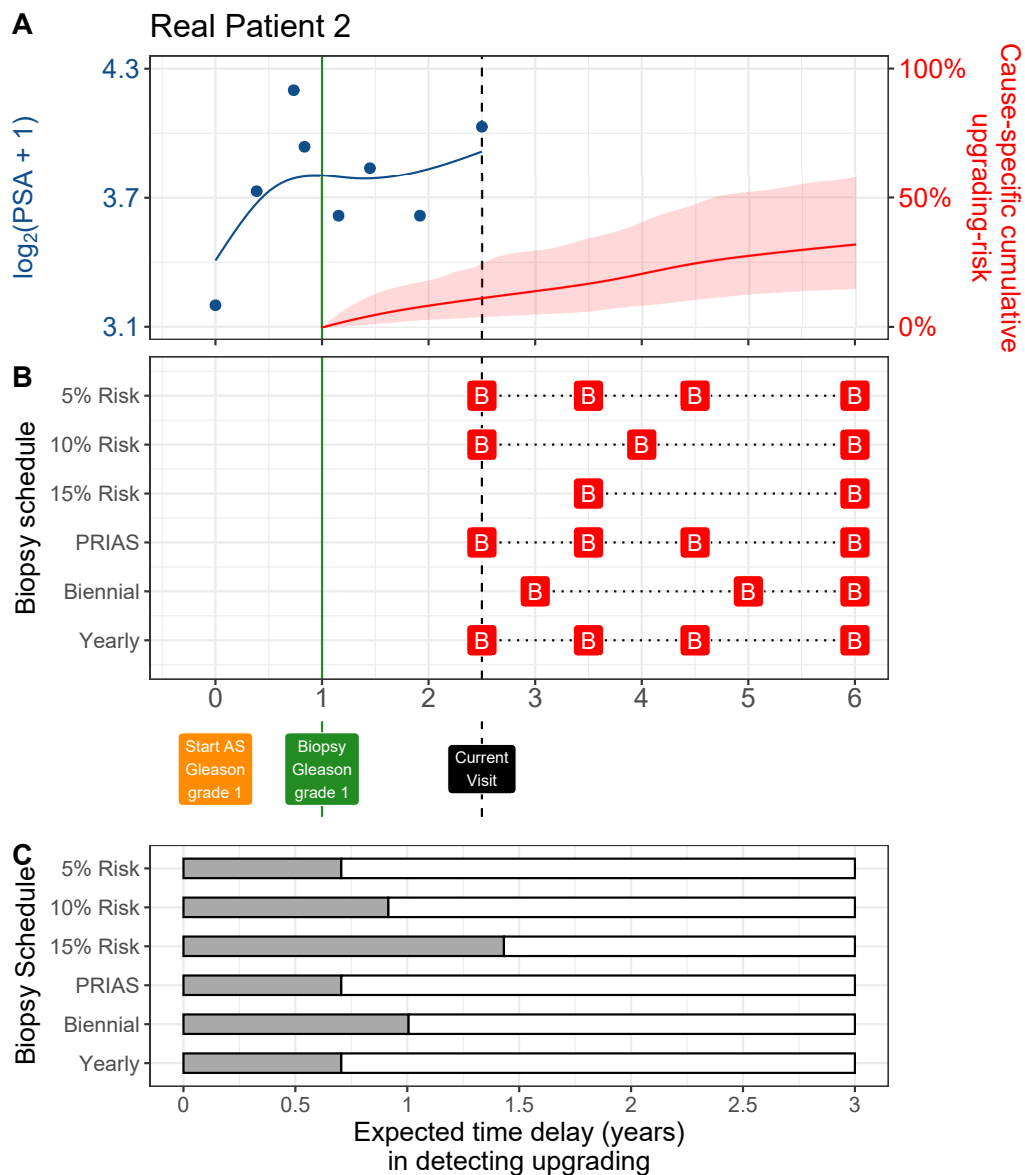

Figure 11: **Personalized and fixed schedules of biopsies for patient 2.** **Panel A:** shows the observed and fitted  $\log_2(\text{PSA} + 1)$  measurements (Equation 1), and the dynamic cause-specific cumulative upgrading-risk (see Appendix B) over follow-up period. **Panel B** shows the personalized and fixed schedules of biopsies with a ‘B’ indicating times of biopsies. Smaller risk thresholds lead to more frequently planned biopsies. **Panel C** various schedules are compared in terms of the expected time delay in detecting upgrading (years) if patient progresses before year six. The maximum time delay with limited adverse consequences is three years [15]. A compulsory biopsy was scheduled at year six (maximum biopsy scheduling time in PRIAS, Table 17) in all schedules for a meaningful comparison between them.



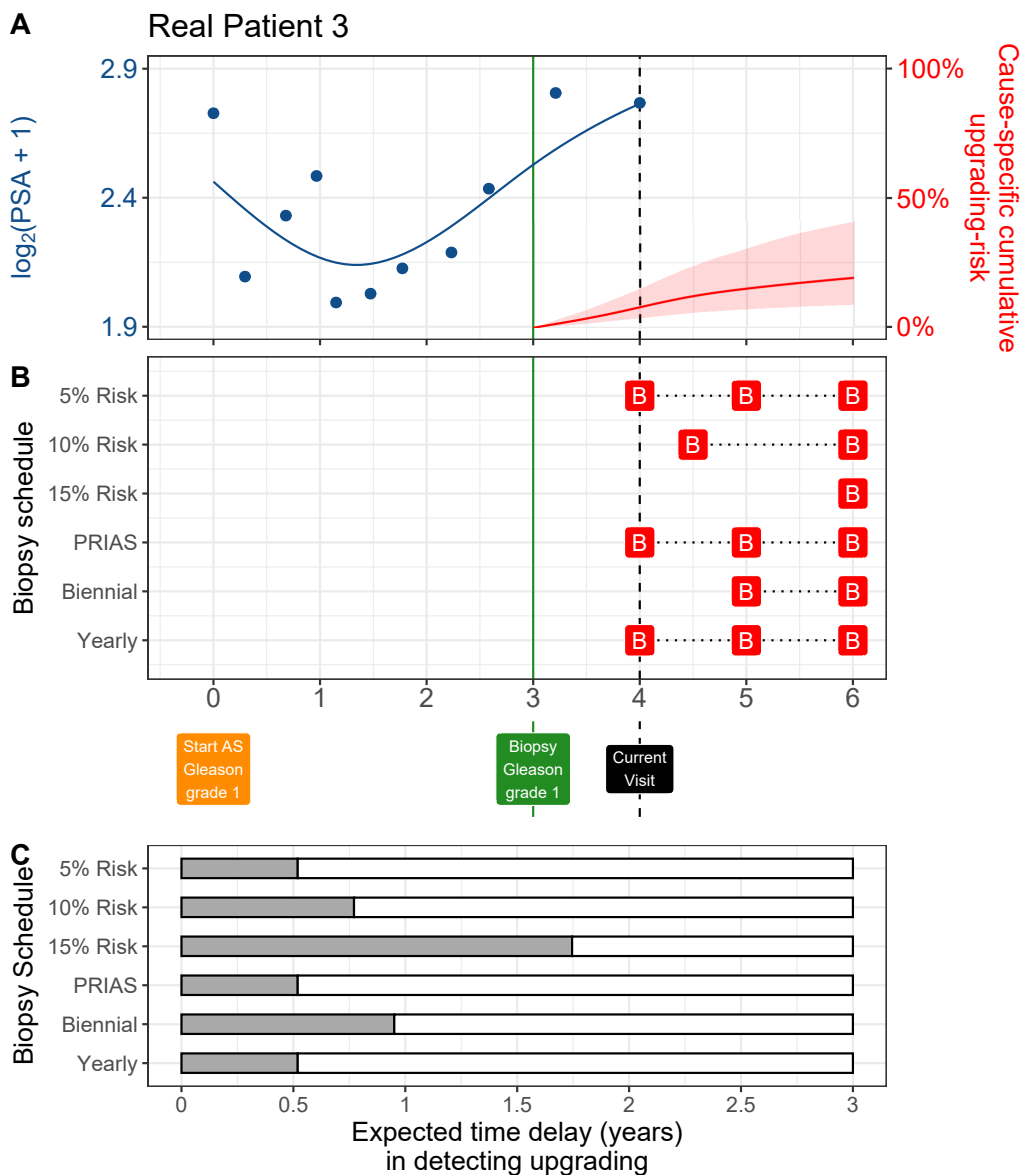

Figure 12: **Personalized and fixed schedules of biopsies for patient 3.** **Panel A:** shows the observed and fitted  $\log_2(\text{PSA} + 1)$  measurements (Equation 1), and the dynamic cause-specific cumulative upgrading-risk (see Appendix B) over follow-up period. **Panel B** shows the personalized and fixed schedules of biopsies with a ‘B’ indicating times of biopsies. Smaller risk thresholds lead to more frequently planned biopsies. **Panel C** various schedules are compared in terms of the expected time delay in detecting upgrading (years) if patient progresses before year six. The maximum time delay with limited adverse consequences is three years [15]. A compulsory biopsy was scheduled at year six (maximum biopsy scheduling time in PRIAS, Table 17) in all schedules for a meaningful comparison between them.

Table 17: **Maximum follow-up period up to which we can reliably make personalized schedules.** In each cohort, this time point is chosen such that there are at least 10 patients who experience upgrading after this time point. Full names of Cohorts are *PRIAS*: Prostate Cancer International Active Surveillance, *Toronto*: University of Toronto Active Surveillance, *Hopkins*: Johns Hopkins Active Surveillance, *MSKCC*: Memorial Sloan Kettering Cancer Center Active Surveillance, *KCL*: King's College London Active Surveillance, *MUSIC*: Michigan Urological Surgery Improvement Collaborative Active Surveillance, *UCSF*: University of California San Francisco Active Surveillance.

| Cohort  | Maximum Personalized Schedule Time (years) |
|---------|--------------------------------------------|
| PRIAS   | 6                                          |
| KCL     | 3                                          |
| MUSIC   | 2                                          |
| Toronto | 8                                          |
| MSKCC   | 6                                          |
| Hopkins | 7                                          |
| UCSF    | 8.5                                        |

236 **Appendix D. Web-Application for Practical Use of Personalized**  
 237 **Schedule of Biopsies**

238 We implemented our methodology in a web-application to assist patients  
 239 and doctors in better decision making. It works on desktop as well as mobile  
 240 devices. The cohorts that are currently supported in this web-application are  
 241 PRIAS and the largest six cohorts from the GAP3 database [8]. These are the  
 242 University of Toronto AS (Toronto), Johns Hopkins AS (Hopkins), Memorial  
 243 Sloan Kettering Cancer Center AS (MSKCC), King’s College London AS  
 244 (KCL), Michigan Urological Surgery Improvement Collaborative AS (MU-  
 245 SIC), and University of California San Francisco Active Surveillance (UCSF).  
 246 The web application is hosted at [https://emcbiostatistics.shinyapps.](https://emcbiostatistics.shinyapps.io/prias_biopsy_recommender/)  
 247 [io/prias\\_biopsy\\_recommender/](https://emcbiostatistics.shinyapps.io/prias_biopsy_recommender/).

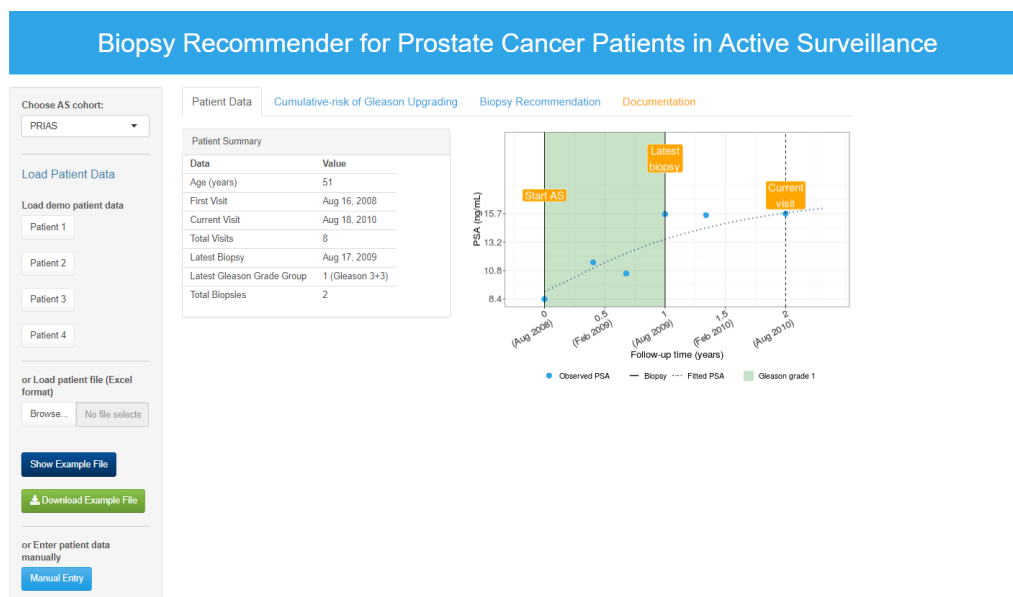

Figure 13: Landing page of the web-application. Panel on the left allows users to load patient data and panel on the right provides information. Patient data can be entered manually, or via Excel files. In addition, demo patient data is already uploaded to assist users in understanding the web-application.

## 248 Appendix E. Source Code

249 The R code for fitting the joint model to the PRIAS dataset, is at [https://github.com/anirudhtomer/prias/tree/master/src/clinical\\_gap3](https://github.com/anirudhtomer/prias/tree/master/src/clinical_gap3). We  
250 refer to this location as ‘R\_HOME’ in the rest of this document.  
251

### 252 *Appendix E.1. Fitting the Joint Model to the PRIAS dataset*

253 **Accessing the dataset:** The PRIAS dataset is not openly accessible.  
254 However, access to the database can be requested via the contact links at  
255 <https://www.prias-project.org>.  
256

257 **Formatting the dataset:** This dataset, however, is in the so-called wide  
258 format and also requires the removal of incorrect entries. This can be done  
259 via the R script `R_HOME/dataset_cleaning.R`. This will lead to two R ob-  
260 jects, namely ‘`prias_final.id`’ and ‘`prias_long_final`’. The ‘`prias_final.id`’ object  
261 contains information about the time of upgrading for PRIAS patients. The  
262 ‘`prias_long_final`’ object contains longitudinal PSA measurements, the time  
263 of biopsies and results of biopsies.  
264

265 **Fitting the joint model:** We use a joint model for time-to-event and  
266 longitudinal data to model the evolution of PSA measurements over time,  
267 and to simultaneously model their association with the risk of upgrading.  
268 The R package we use for this purpose is called **JMbayes** ([https://cran.r-](https://cran.r-project.org/web/packages/JMbayes/JMbayes.pdf)  
269 [project.org/web/packages/JMbayes/JMbayes.pdf](https://cran.r-project.org/web/packages/JMbayes/JMbayes.pdf)). The API we use, how-  
270 ever, is currently not hosted on CRAN, and can be found here: [https:](https://github.com/anirudhtomer/JMbayes)  
271 [//github.com/anirudhtomer/JMbayes](https://github.com/anirudhtomer/JMbayes). The joint model can be fitted via  
272 the script `R_HOME/analysis.R`. It takes roughly 6 hours to run on an Intel  
273 Core-i5 machine with four cores and 8GB of RAM.

274 The graphs presented in the main manuscript, and the supplementary  
275 material can be generated by the scripts in `R_HOME/plots/`.

### 276 *Appendix E.2. Validation of Predictions of Upgrading*

277 Validations can be done using the scripts `R_HOME/validation/auc_brier/`  
278 `auc_calculator.R`, and `R_HOME/validation/auc_brier/gof_calculator.`  
279 `R`. For external validation access to GAP3 database is required.

280 *Appendix E.3. Creating Personalized Schedules of Biopsies*

281     Once a joint model is fitted to the PRIAS dataset, personalized schedules  
282 of biopsies based on the risk of upgrading for new patients can be developed as  
283 shown in the script `R_HOME/plots/demo_schedule_supplementary.R` or di-  
284 rectly using the script `https://raw.githubusercontent.com/anirudhtomer/`  
285 `prias/master/src/lastpaper/pers\_schedule\_api.R`.

286 *Appendix E.4. Source Code for Web Application*

287     Source code for the shiny web application which provides biopsy schedules  
288 for patients can be found at `R_HOME/shinyapp`

289 **Appendix F. Appendix A. Members of The Movember Founda-**  
290 **tion’s Global Action Plan Prostate Cancer Active**  
291 **Surveillance (GAP3) consortium**

292 *Principle Investigators:* Bruce Trock (Johns Hopkins University, The  
293 James Buchanan Brady Urological Institute, Baltimore, USA), Behfar Ehdaie  
294 (Memorial Sloan Kettering Cancer Center, New York, USA), Peter Car-  
295 roll (University of California San Francisco, San Francisco, USA), Christo-  
296 pher Filson (Emory University School of Medicine, Winship Cancer Insti-  
297 tute, Atlanta, USA), Jeri Kim / Christopher Logothetis (MD Anderson  
298 Cancer Centre, Houston, USA), Todd Morgan (University of Michigan and  
299 Michigan Urological Surgery Improvement Collaborative (MUSIC), Michi-  
300 gan, USA), Laurence Klotz (University of Toronto, Sunnybrook Health Sci-  
301 ences Centre, Toronto, Ontario, Canada), Tom Pickles (University of British  
302 Columbia, BC Cancer Agency, Vancouver, Canada), Eric Hyndman (Uni-  
303 versity of Calgary, Southern Alberta Institute of Urology, Calgary, Canada),  
304 Caroline Moore (University College London & University College London  
305 Hospital Trust, London, UK), Vincent Gnanapragasam (University of Cam-  
306 bridge & Cambridge University Hospitals NHS Foundation Trust, Cam-  
307 bridge, UK), Mieke Van Hemelrijck (King’s College London, London, UK  
308 & Guy’s and St Thomas’ NHS Foundation Trust, London, UK), Prokar  
309 Dasgupta (Guy’s and St Thomas’ NHS Foundation Trust, London, UK),  
310 Chris Bangma (Erasmus Medical Center, Rotterdam, The Netherlands/ rep-  
311 resentative of Prostate cancer Research International Active Surveillance  
312 (PRIAS) consortium), Monique Roobol (Erasmus Medical Center, Rotter-  
313 dam, The Netherlands/ representative of Prostate cancer Research Interna-  
314 tional Active Surveillance (PRIAS) consortium), The PRIAS study group,  
315 Arnauld Villers (Lille University Hospital Center, Lille, France), Antti Ran-  
316 nikko (Helsinki University and Helsinki University Hospital, Helsinki, Fin-  
317 land), Riccardo Valdagni (Department of Oncology and Hemato-oncology,  
318 Università degli Studi di Milano, Radiation Oncology 1 and Prostate Cancer  
319 Program, Fondazione IRCCS Istituto Nazionale dei Tumori, Milan, Italy),  
320 Antoinette Perry (University College Dublin, Dublin, Ireland), Jonas Hugos-  
321 son (Sahlgrenska University Hospital, Göteborg, Sweden), Jose Rubio-Briones  
322 (Instituto Valenciano de Oncología, Valencia, Spain), Anders Bjartell (Skåne  
323 University Hospital, Malmö, Sweden), Lukas Hefermehl (Kantonsspital Baden,  
324 Baden, Switzerland), Lee Lui Shiong (Singapore General Hospital, Singa-  
325 pore, Singapore), Mark Frydenberg (Monash Health; Monash University,

326 Melbourne, Australia), Yoshiyuki Kakehi / Mikio Sugimoto (Kagawa Uni-  
 327 versity Faculty of Medicine, Kagawa, Japan), Byung Ha Chung (Gangnam  
 328 Severance Hospital, Yonsei University Health System, Seoul, Republic of Ko-  
 329 rea)

330 *Pathologist:* Theo van der Kwast (Princess Margaret Cancer Centre,  
 331 Toronto, Canada). Technology Research Partners: Henk Obbink (Royal  
 332 Philips, Eindhoven, the Netherlands), Wim van der Linden (Royal Philips,  
 333 Eindhoven, the Netherlands), Tim Hulsen (Royal Philips, Eindhoven, the  
 334 Netherlands), Cees de Jonge (Royal Philips, Eindhoven, the Netherlands).

335 *Advisory Regional statisticians:* Mike Kattan (Cleveland Clinic, Cleve-  
 336 land, Ohio, USA), Ji Xinge (Cleveland Clinic, Cleveland, Ohio, USA), Ken-  
 337 neth Muir (University of Manchester, Manchester, UK), Artitaya Lophatananon  
 338 (University of Manchester, Manchester, UK), Michael Fahey (Epworth Health-  
 339 Care, Melbourne, Australia), Ewout Steyerberg (Erasmus Medical Center,  
 340 Rotterdam, The Netherlands), Daan Nieboer (Erasmus Medical Center, Rot-  
 341 terdam, The Netherlands); Liying Zhang (University of Toronto, Sunnybrook  
 342 Health Sciences Centre, Toronto, Ontario, Canada)

343 *Executive Regional statisticians:* Ewout Steyerberg (Erasmus Medical  
 344 Center, Rotterdam, The Netherlands), Daan Nieboer (Erasmus Medical Cen-  
 345 ter, Rotterdam, The Netherlands); Kerri Beckmann (King's College London,  
 346 London, UK & Guy's and St Thomas' NHS Foundation Trust, London, UK),  
 347 Brian Denton (University of Michigan, Michigan, USA), Andrew Hayen (Uni-  
 348 versity of Technology Sydney, Australia), Paul Boutros (Ontario Institute of  
 349 Cancer Research, Toronto, Ontario, Canada).

350 *Clinical Research Partners' IT Experts:* Wei Guo (Johns Hopkins Uni-  
 351 versity, The James Buchanan Brady Urological Institute, Baltimore, USA),  
 352 Nicole Benfante (Memorial Sloan Kettering Cancer Center, New York, USA),  
 353 Janet Cowan (University of California San Francisco, San Francisco, USA),  
 354 Dattatraya Patil (Emory University School of Medicine, Winship Cancer In-  
 355 stitute, Atlanta, USA), Emily Tolosa (MD Anderson Cancer Centre, Hous-  
 356 ton, Texas, USA), Tae-Kyung Kim (University of Michigan and Michigan  
 357 Urological Surgery Improvement Collaborative, Ann Arbor, Michigan, USA),  
 358 Alexandre Mamedov (University of Toronto, Sunnybrook Health Sciences  
 359 Centre, Toronto, Ontario, Canada), Vincent LaPointe (University of British  
 360 Columbia, BC Cancer Agency, Vancouver, Canada), Trafford Crump (Uni-  
 361 versity of Calgary, Southern Alberta Institute of Urology, Calgary, Canada),  
 362 Vasilis Stavrinides (University College London & University College Lon-  
 363 don Hospital Trust, London, UK), Jenna Kimberly-Duffell (University of

364 Cambridge & Cambridge University Hospitals NHS Foundation Trust, Cam-  
 365 bridge, UK), Aida Santaolalla (King’s College London, London, UK & Guy’s  
 366 and St Thomas’ NHS Foundation Trust, London, UK), Daan Nieboer (Eras-  
 367 mus Medical Center, Rotterdam, The Netherlands), Jonathan Olivier (Lille  
 368 University Hospital Center, Lille, France), Tiziana Rancati (Fondazione IR-  
 369 CCS Istituto Nazionale dei Tumori di Milano, Milan, Italy), Helén Ahlgren  
 370 (Sahlgrenska University Hospital, Göteborg, Sweden), Juanma Mascarós (In-  
 371 stituto Valenciano de Oncología, Valencia, Spain), Annica Löfgren (Skåne  
 372 University Hospital, Malmö, Sweden), Kurt Lehmann (Kantonsspital Baden,  
 373 Baden, Switzerland), Catherine Han Lin (Monash University and Epworth  
 374 HealthCare, Melbourne, Australia), Hiromi Hiram (Kagawa University, Ka-  
 375 gawa, Japan), Kwang Suk Lee (Yonsei University College of Medicine, Gang-  
 376 nam Severance Hospital, Seoul, Korea).

377 *Research Advisory Committee:* Guido Jenster (Erasmus MC, Rotterdam,  
 378 the Netherlands), Anssi Auvinen (University of Tampere, Tampere, Fin-  
 379 land), Anders Bjartell (Skåne University Hospital, Malmö, Sweden), Ma-  
 380 soom Haider (University of Toronto, Toronto, Canada), Kees van Bochove  
 381 (The Hyve B.V. Utrecht, Utrecht, the Netherlands), Ballentine Carter (Johns  
 382 Hopkins University, Baltimore, USA – until 2018).

383 *Management team:* Sam Gledhill (Movember Foundation, Melbourne,  
 384 Australia), Mark Buzza / Michelle Kouspou (Movember Foundation, Mel-  
 385 bourne, Australia), Chris Bangma (Erasmus Medical Center, Rotterdam,  
 386 The Netherlands), Monique Roobol (Erasmus Medical Center, Rotterdam,  
 387 The Netherlands), Sophie Bruinsma / Jozien Helleman (Erasmus Medical  
 388 Center, Rotterdam, The Netherlands).

## 389 References

- 390 1. Epstein JI, Egevad L, Amin MB, Delahunt B, Srigley JR, Humphrey PA.  
 391 The 2014 international society of urological pathology (ISUP) consensus  
 392 conference on Gleason grading of prostatic carcinoma. *The American*  
 393 *journal of surgical pathology* 2016;40(2):244–52.
- 394 2. Pearson JD, Morrell CH, Landis PK, Carter HB, Brant LJ. Mixed-  
 395 effects regression models for studying the natural history of prostate  
 396 disease. *Statistics in Medicine* 1994;13(5-7):587–601.
- 397 3. Lin H, McCulloch CE, Turnbull BW, Slate EH, Clark LC. A latent



- 398 class mixed model for analysing biomarker trajectories with irregularly  
399 scheduled observations. *Statistics in Medicine* 2000;19(10):1303–18.
- 400 4. De Boor C. A practical guide to splines; vol. 27. Springer-Verlag New  
401 York; 1978.
- 402 5. Eilers PH, Marx BD. Flexible smoothing with B-splines and penalties.  
403 *Statistical Science* 1996;11(2):89–121.
- 404 6. Tsiatis AA, Davidian M. Joint modeling of longitudinal and time-to-  
405 event data: an overview. *Statistica Sinica* 2004;14(3):809–34.
- 406 7. Gentleman R, Geyer CJ. Maximum likelihood for interval censored data:  
407 Consistency and computation. *Biometrika* 1994;81(3):618–23.
- 408 8. Bruinsma SM, Zhang L, Roobol MJ, Bangma CH, Steyerberg EW,  
409 Nieboer D, Van Hemelrijck M, consortium MFGAPPCASG, Trock B,  
410 Ehdaie B, et al. The Movember foundation’s GAP3 cohort: a profile of  
411 the largest global prostate cancer active surveillance database to date.  
412 *BJU international* 2018;121(5):737–44.
- 413 9. Turnbull BW. The empirical distribution function with arbitrarily  
414 grouped, censored and truncated data. *Journal of the Royal Statisti-  
415 cal Society Series B (Methodological)* 1976;38(3):290–5.
- 416 10. Rizopoulos D. The R package JMbayes for fitting joint models for lon-  
417 gitudinal and time-to-event data using MCMC. *Journal of Statistical  
418 Software* 2016;72(7):1–46.
- 419 11. Rizopoulos D, Molenberghs G, Lesaffre EM. Dynamic predictions with  
420 time-dependent covariates in survival analysis using joint modeling and  
421 landmarking. *Biometrical Journal* 2017;59(6):1261–76.
- 422 12. Steyerberg EW, Vickers AJ, Cook NR, Gerds T, Gonen M, Obuchowski  
423 N, Pencina MJ, Kattan MW. Assessing the performance of prediction  
424 models: a framework for some traditional and novel measures. *Epidemi-  
425 ology (Cambridge, Mass)* 2010;21(1):128.
- 426 13. Bokhorst LP, Alberts AR, Rannikko A, Valdagni R, Pickles T, Kakehi Y,  
427 Bangma CH, Roobol MJ, PRIAS study group . Compliance rates with  
428 the Prostate Cancer Research International Active Surveillance (PRIAS)

- 429 protocol and disease reclassification in noncompliers. *European Urology*  
430 2015;68(5):814–21.
- 431 14. Nieboer D, Tomer A, Rizopoulos D, Roobol MJ, Steyerberg EW. Active  
432 surveillance: a review of risk-based, dynamic monitoring. *Translational*  
433 *andrology and urology* 2018;7(1):106–15.
- 434 15. de Carvalho TM, Heijnsdijk EA, de Koning HJ. Estimating the risks  
435 and benefits of active surveillance protocols for prostate cancer: a mi-  
436 crosimulation study. *BJU international* 2017;119(4):560–6.
